# Supplementary material for: An indole diketopiperazine alkaloid and a bisabolane sesquiterpenoid with unprecedented skeletons from Aspergillus fumigatus
Source: Royal Society of Chemistry journal article supplement (doi:10.1039/d2ob02220f), 2023-01-01
Supplement: d2ob02220f1.pdf [file d2ob02220f1.pdf]

## Supporting Information

# An indole diketopiperazine alkaloid and a bisabolane sesquiterpenoid with unprecedented skeletons from *Aspergillus fumigatus*

Yaqin Jiang,<sup>‡a</sup> Chunmei Chen,<sup>‡a</sup> Hucheng Zhu,<sup>‡a</sup> Qin Li,<sup>a</sup> Lina Mao,<sup>a</sup> Hong Liao,<sup>a</sup> Yiyang Nan,<sup>a</sup> Zhiping Wang,<sup>b</sup> Hongjian Zhou,<sup>a</sup> Qun Zhou,<sup>\*a</sup> Yonghui Zhang<sup>\*a</sup>

<sup>a</sup>Hubei Key Laboratory of Natural Medicinal Chemistry and Resource Evaluation, School of Pharmacy, Tongji Medical College, Huazhong University of Science and Technology, Wuhan 430030, People's Republic of China.

<sup>b</sup>Guangdong Provincial Key Laboratory of Advanced Drug Delivery Systems and Guangdong Provincial Engineering Center of Topical Precise Drug Delivery System, School of Pharmacy, Guangdong Pharmaceutical University, Guangzhou, 510006, People's Republic of China.

\*Corresponding authors E-mail:

zhangyh@mails.tjmu.edu.cn (Y.Z.), zqtcn@hust.edu.cn(Q. Zhou)

## List of Supporting Information

|                                                                                                           |    |
|-----------------------------------------------------------------------------------------------------------|----|
| <b>Figure S1.</b> UV spectrum of compound <b>1</b> in MeCN. ....                                          | 5  |
| <b>Figure S2.</b> IR spectrum of compound <b>1</b> . ....                                                 | 5  |
| <b>Figure S3.</b> $^1\text{H}$ NMR spectrum of compound <b>1</b> (600 MHz, DMSO- $d_6$ ). ....            | 6  |
| <b>Figure S4.</b> $^{13}\text{C}$ and DEPT NMR spectra of compound <b>1</b> (150 MHz, DMSO- $d_6$ ). .... | 6  |
| <b>Figure S5.</b> HSQC spectrum of compound <b>1</b> (DMSO- $d_6$ ). ....                                 | 7  |
| <b>Figure S6.</b> $^1\text{H}$ - $^1\text{H}$ COSY spectrum of compound <b>1</b> (DMSO- $d_6$ ). ....     | 7  |
| <b>Figure S7.</b> HMBC spectrum of compound <b>1</b> (DMSO- $d_6$ ). ....                                 | 8  |
| <b>Figure S8.</b> NOESY spectrum of compound <b>1</b> (DMSO- $d_6$ ). ....                                | 8  |
| <b>Figure S9.</b> HRESIMS spectrum of compound <b>1</b> . ....                                            | 9  |
| <b>Figure S10.</b> UV spectrum of compound <b>2</b> in MeOH. ....                                         | 9  |
| <b>Figure S11.</b> IR spectrum of compound <b>2</b> . ....                                                | 10 |
| <b>Figure S12.</b> $^1\text{H}$ NMR spectrum of compound <b>2</b> (400 MHz, CD $_3$ OD). ....             | 10 |
| <b>Figure S13.</b> $^{13}\text{C}$ and DEPT NMR spectra of compound <b>2</b> (100 MHz, CD $_3$ OD). ....  | 11 |
| <b>Figure S14.</b> HSQC spectrum of compound <b>2</b> (CD $_3$ OD). ....                                  | 11 |
| <b>Figure S15.</b> $^1\text{H}$ - $^1\text{H}$ COSY spectrum of compound <b>2</b> (CD $_3$ OD). ....      | 12 |
| <b>Figure S16.</b> HMBC spectrum of compound <b>2</b> (CD $_3$ OD). ....                                  | 12 |

|                                                                                                                                                                                            |    |
|--------------------------------------------------------------------------------------------------------------------------------------------------------------------------------------------|----|
| <b>Figure S17.</b> NOESY spectrum of compound <b>2</b> (CD <sub>3</sub> OD).....                                                                                                           | 13 |
| <b>Figure S18.</b> HRESIMS spectrum of compound <b>2</b> .....                                                                                                                             | 13 |
| <b>Figure S19.</b> <sup>1</sup> H NMR, <sup>13</sup> C and DEPT NMR spectra of compounds <b>3–8</b> .....                                                                                  | 19 |
| <b>Figure S20.</b> Linear correlation plots (A) and the relative errors (B) between the experimental and calculated <sup>13</sup> C NMR chemical shifts of <b>2a</b> and <b>2b</b> . ..... | 20 |
| NMR calculation for compound <b>2</b> .....                                                                                                                                                | 20 |
| <b>Table S1.</b> Gibbs free energies <sup>a</sup> and equilibrium populations <sup>b</sup> of low-energy conformers of <b>2a</b> .....                                                     | 20 |
| <b>Table S2.</b> Cartesian coordinates for the low-energy reoptimized random reseach conformers of <b>2a</b> at B3LYP-D3(BJ)/6-31G* level of theory in methanol. ....                      | 21 |
| <b>Table S3.</b> Gibbs free energies <sup>a</sup> and equilibrium populations <sup>b</sup> of low-energy conformers of <b>2b</b> .....                                                     | 31 |
| <b>Table S4.</b> Cartesian coordinates for the low-energy reoptimized random reseach conformers of <b>2b</b> at B3LYP-D3(BJ)/6-31G* level of theory in methanol. ....                      | 32 |
| <b>Table S5.</b> DP4+ analysis of compound <b>2</b> .....                                                                                                                                  | 42 |
| ECD calculation of compound <b>2</b> . ....                                                                                                                                                | 43 |
| <b>Table S6.</b> Gibbs free energies <sup>a</sup> and equilibrium populations <sup>b</sup> of low-energy conformers of <b>2</b> .....                                                      | 43 |
| <b>Table S7.</b> Cartesian coordinates for the low-energy reoptimized random reseach conformers of <b>2</b> at B3LYP-D3(BJ)/6-31G* level of theory in methanol. ....                       | 44 |
| <b>Table S8.</b> Gibbs free energies <sup>a</sup> and equilibrium populations <sup>b</sup> of low-energy conformers of <b>2</b> .....                                                      | 49 |

|                                                                                                                                                                      |    |
|----------------------------------------------------------------------------------------------------------------------------------------------------------------------|----|
| <b>Table S9.</b> Cartesian coordinates for the low-energy reoptimized random reseach conformers of <b>2</b> at B3LYP-D3(BJ)/6-31G* level of theory in methanol. .... | 50 |
| <b>Table S10.</b> IC <sub>50</sub> (48h, $\mu$ M) of compounds <b>1–8</b> against human tumor cell lines. ....                                                       | 55 |
| <b>Table S11.</b> Immunosuppressive effects of compounds <b>1–8</b> on murine lymphocyte proliferation induced by ConA (5 $\mu$ g/mL) or LPS (10 $\mu$ g/mL).....    | 56 |

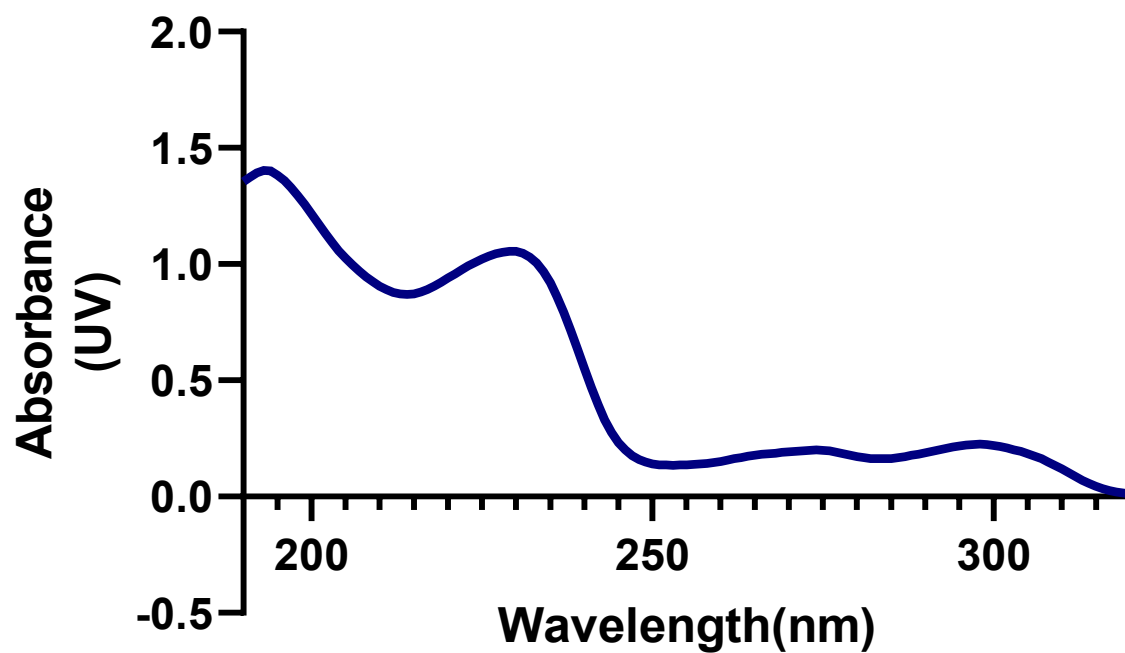

Figure S1. UV spectrum of compound 1 in MeCN.

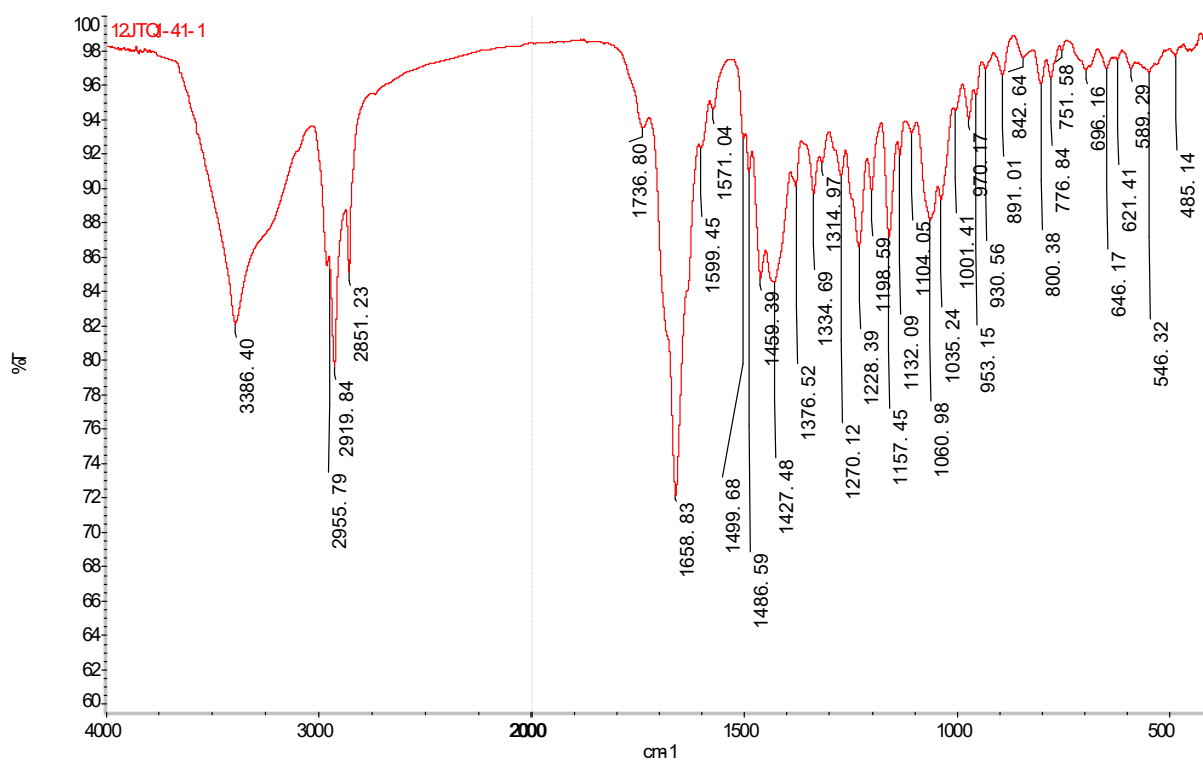

Figure S2. IR spectrum of compound 1.

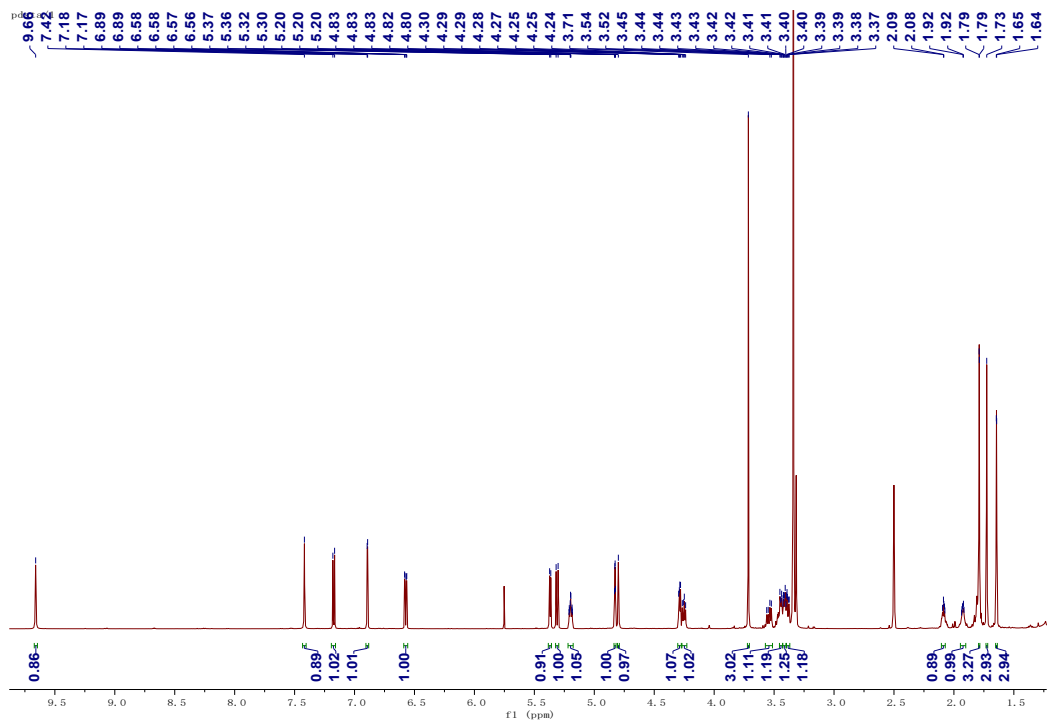

Figure S3.  $^1\text{H}$  NMR spectrum of compound **1** (600 MHz,  $\text{DMSO-}d_6$ ).

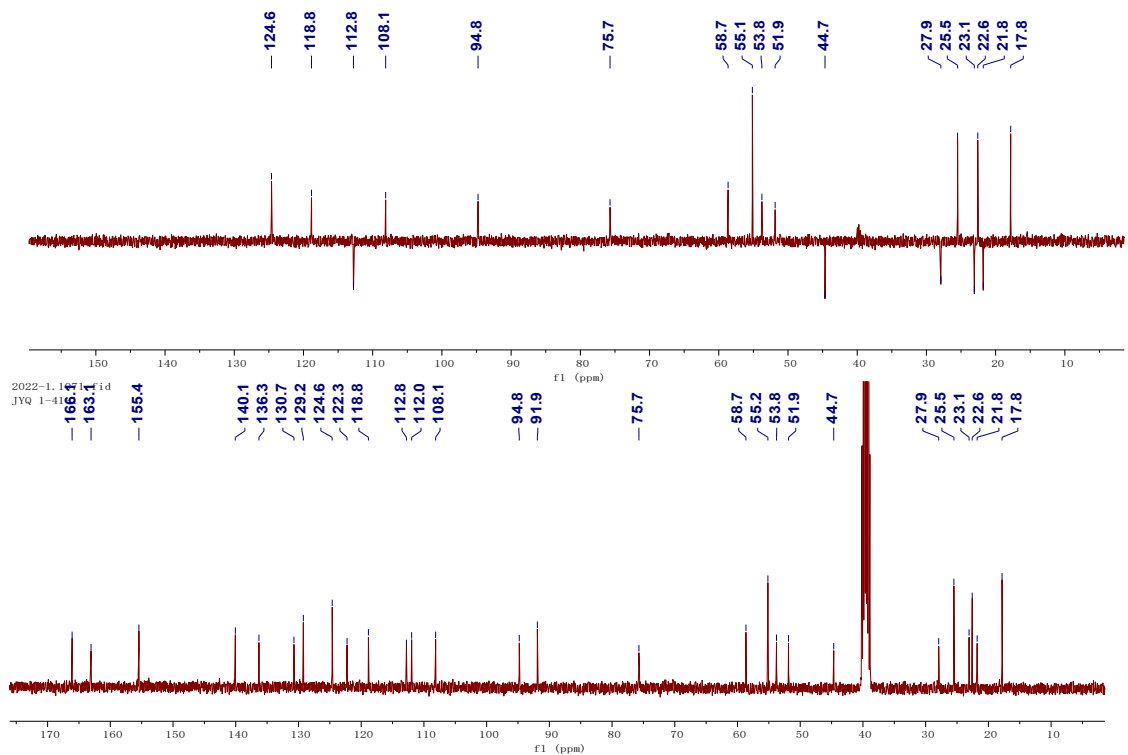

Figure S4.  $^{13}\text{C}$  and DEPT NMR spectra of compound **1** (150 MHz,  $\text{DMSO-}d_6$ ).

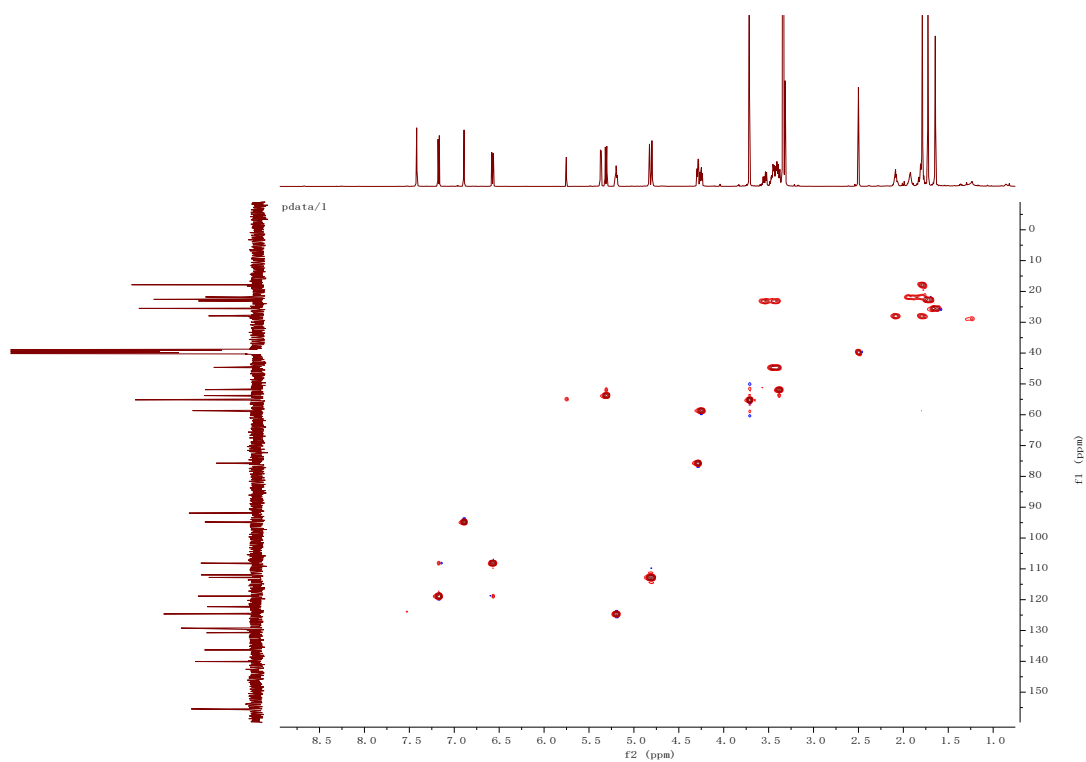

**Figure S5.** HSQC spectrum of compound **1** (DMSO- $d_6$ ).

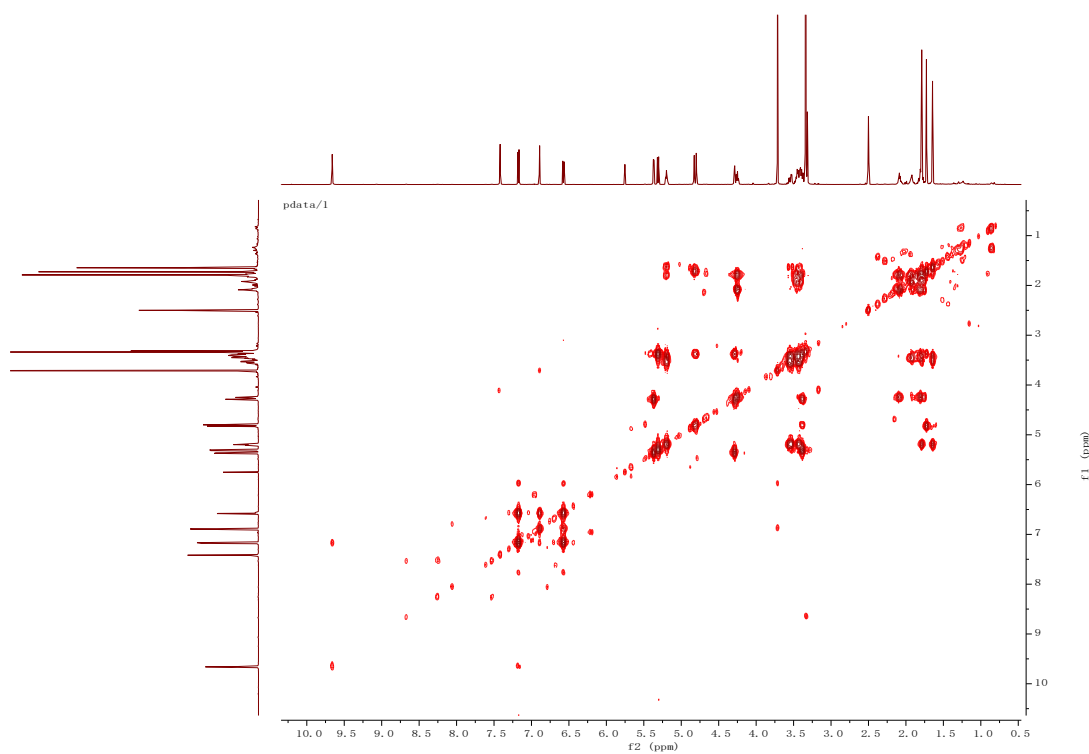

**Figure S6.**  $^1\text{H}$ - $^1\text{H}$  COSY spectrum of compound **1** (DMSO- $d_6$ ).

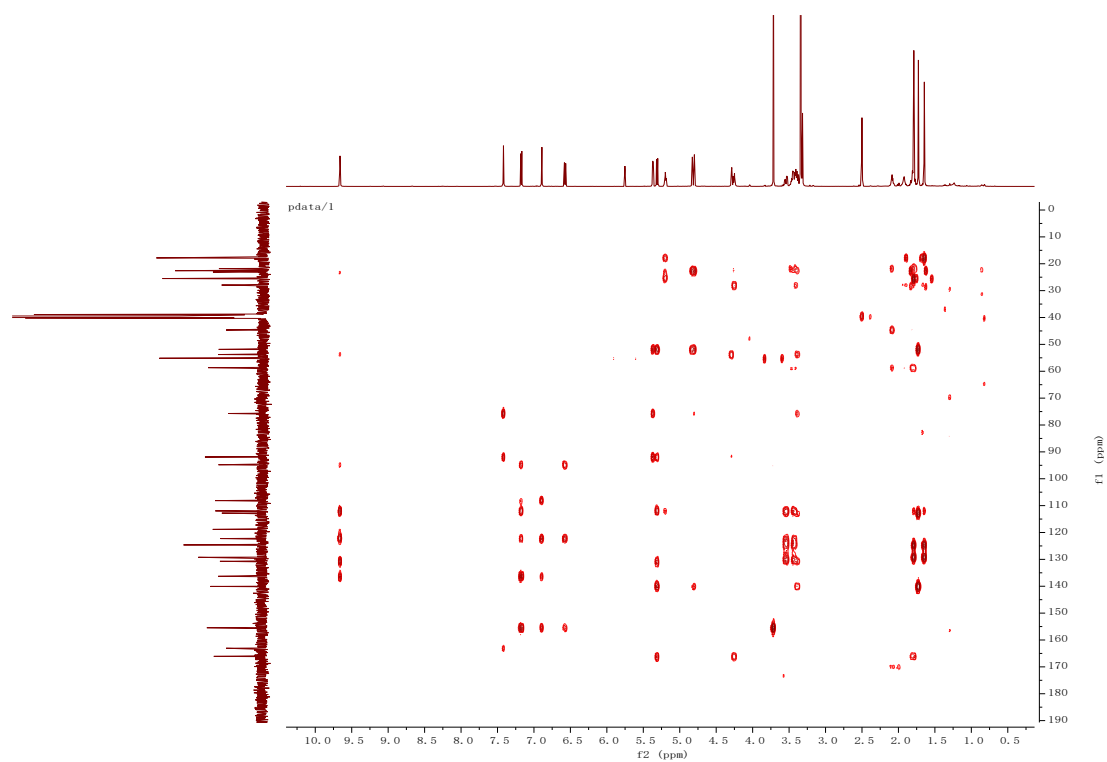

**Figure S7.** HMBC spectrum of compound **1** (DMSO- $d_6$ ).

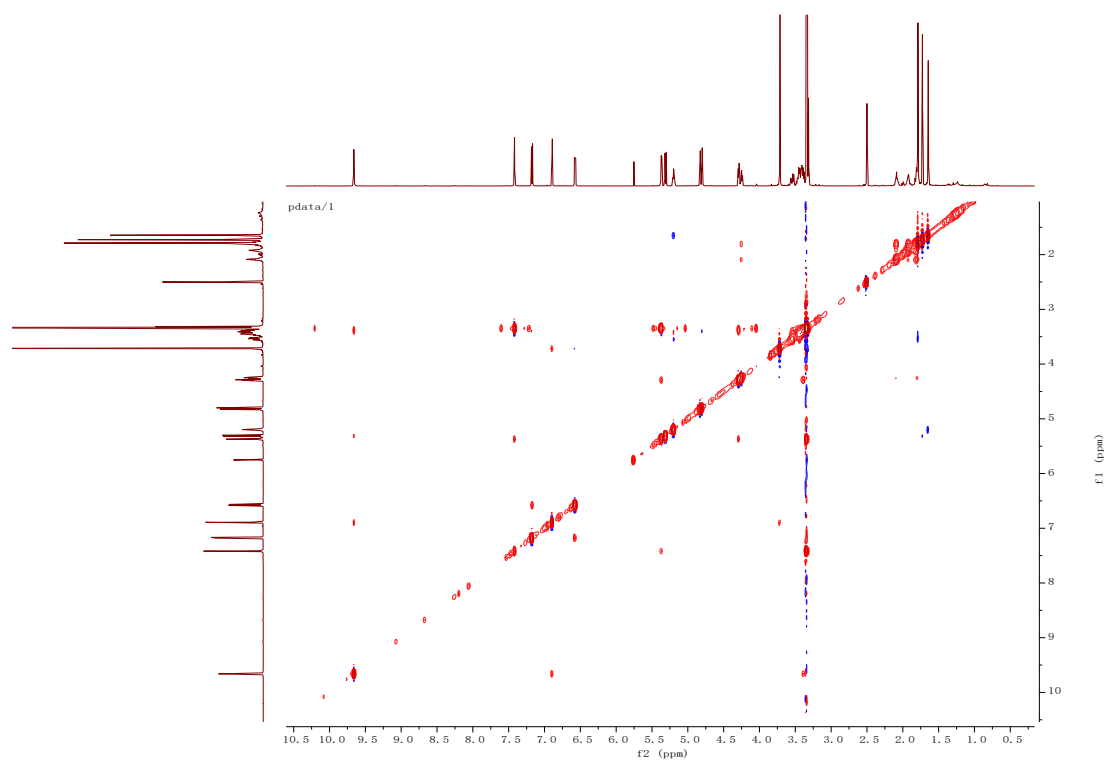

**Figure S8.** NOESY spectrum of compound **1** (DMSO- $d_6$ ).



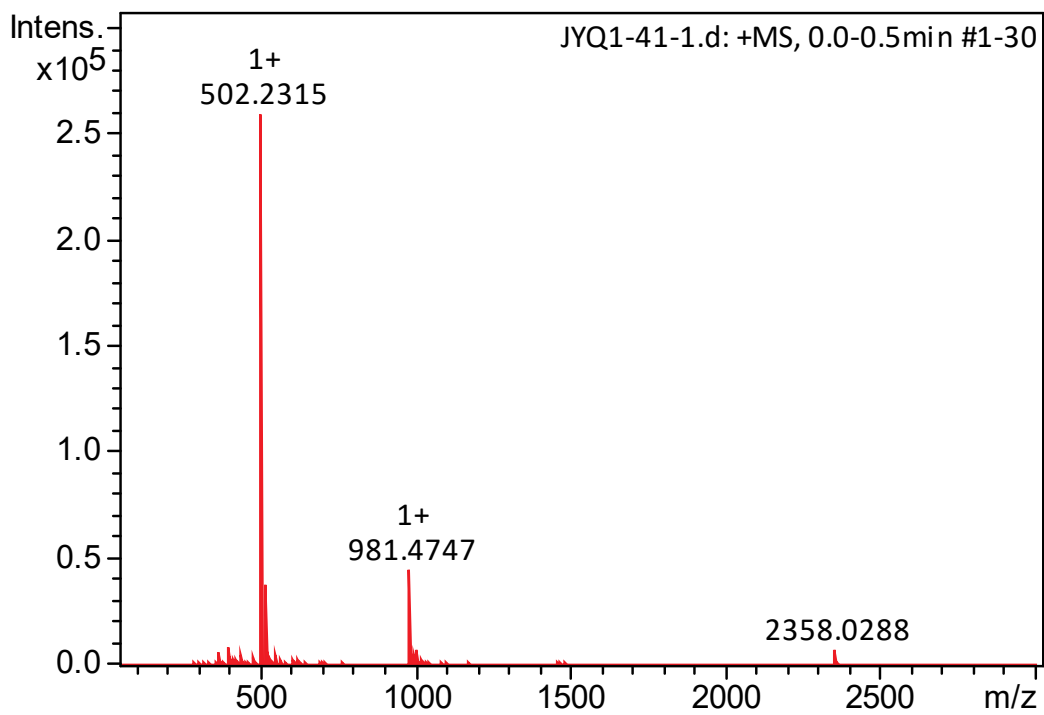

Figure S9. HRESIMS spectrum of compound 1.

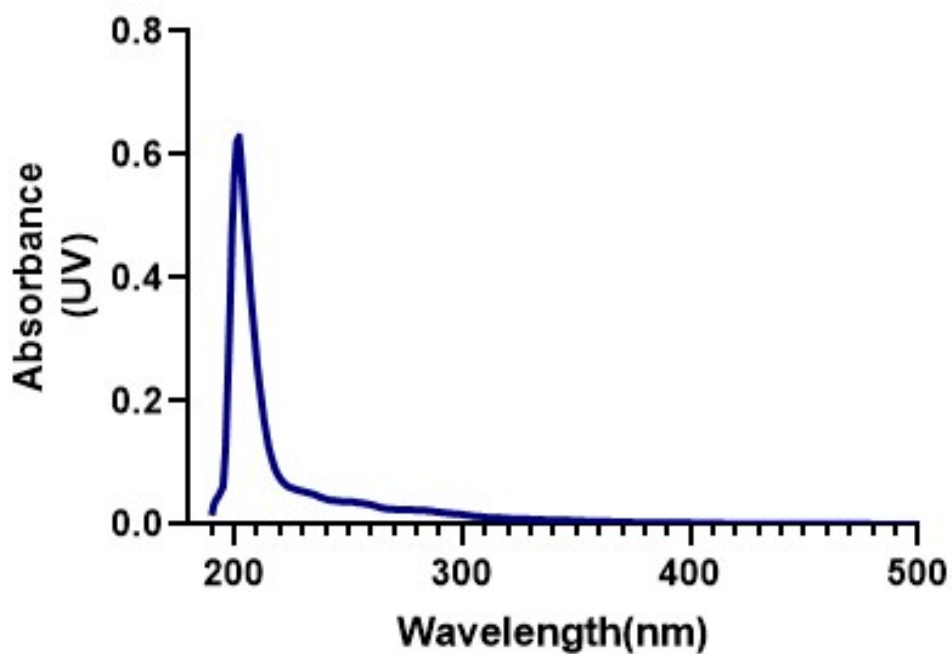

Figure S10. UV spectrum of compound 2 in MeOH.

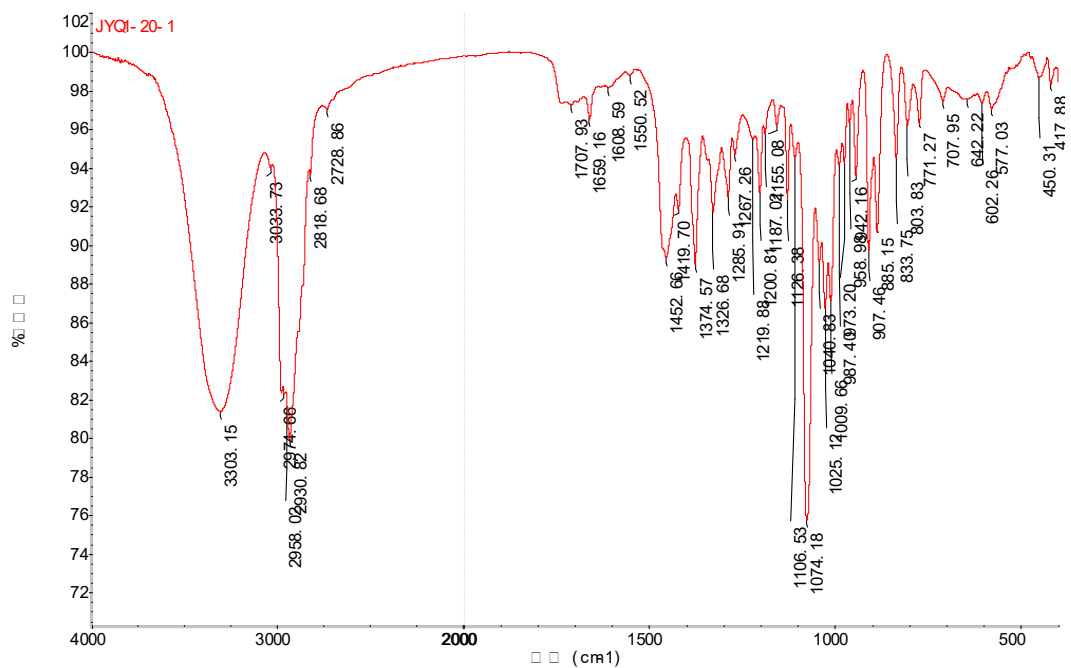

Figure S11. IR spectrum of compound 2.

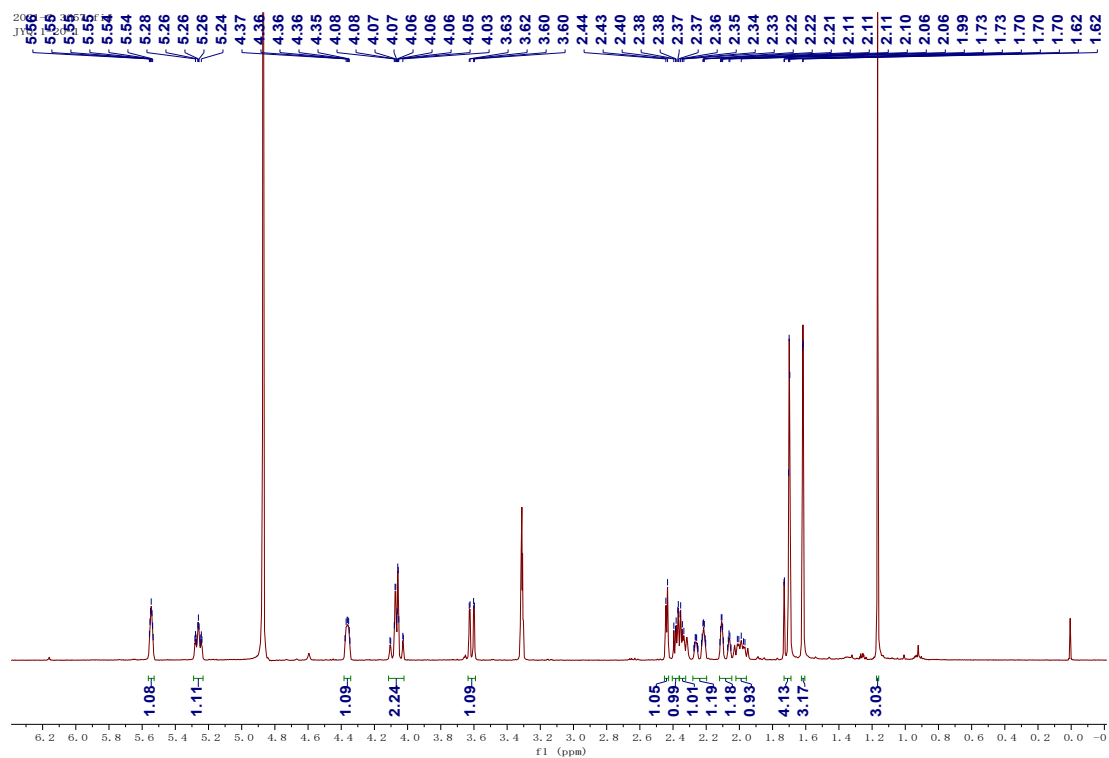

Figure S12. <sup>1</sup>H NMR spectrum of compound 2 (400 MHz, CD<sub>3</sub>OD).

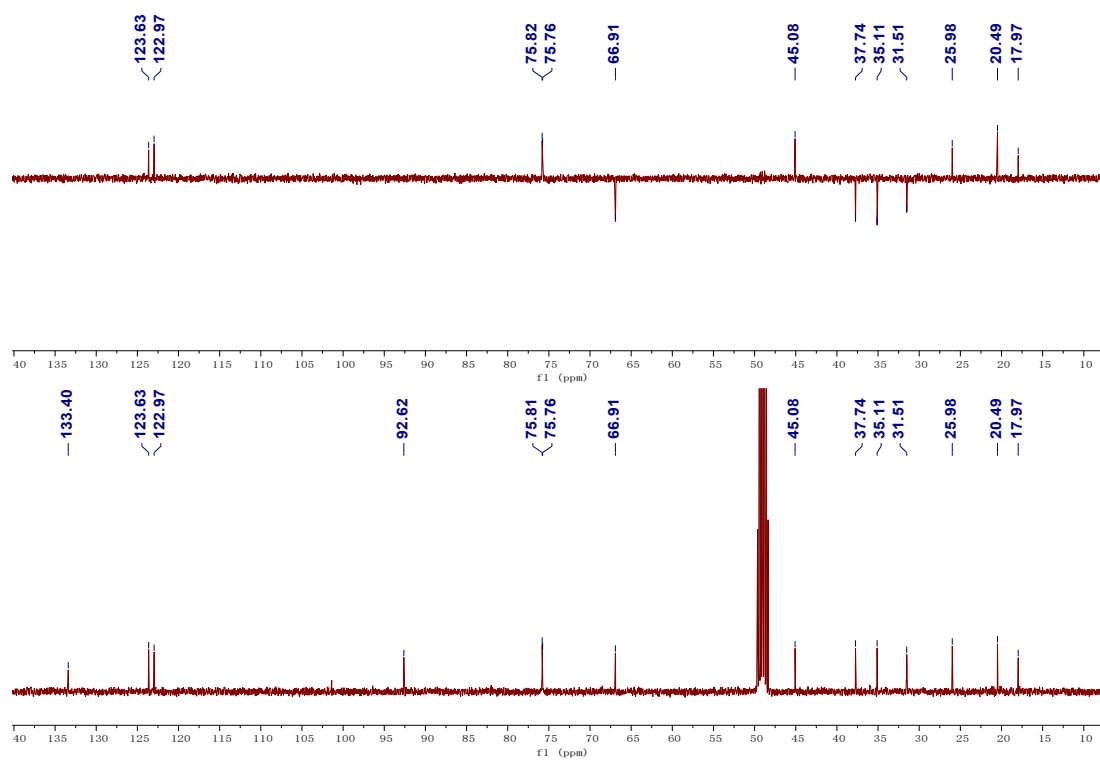

**Figure S13.**  $^{13}\text{C}$  and DEPT NMR spectra of compound **2** (100 MHz,  $\text{CD}_3\text{OD}$ ).

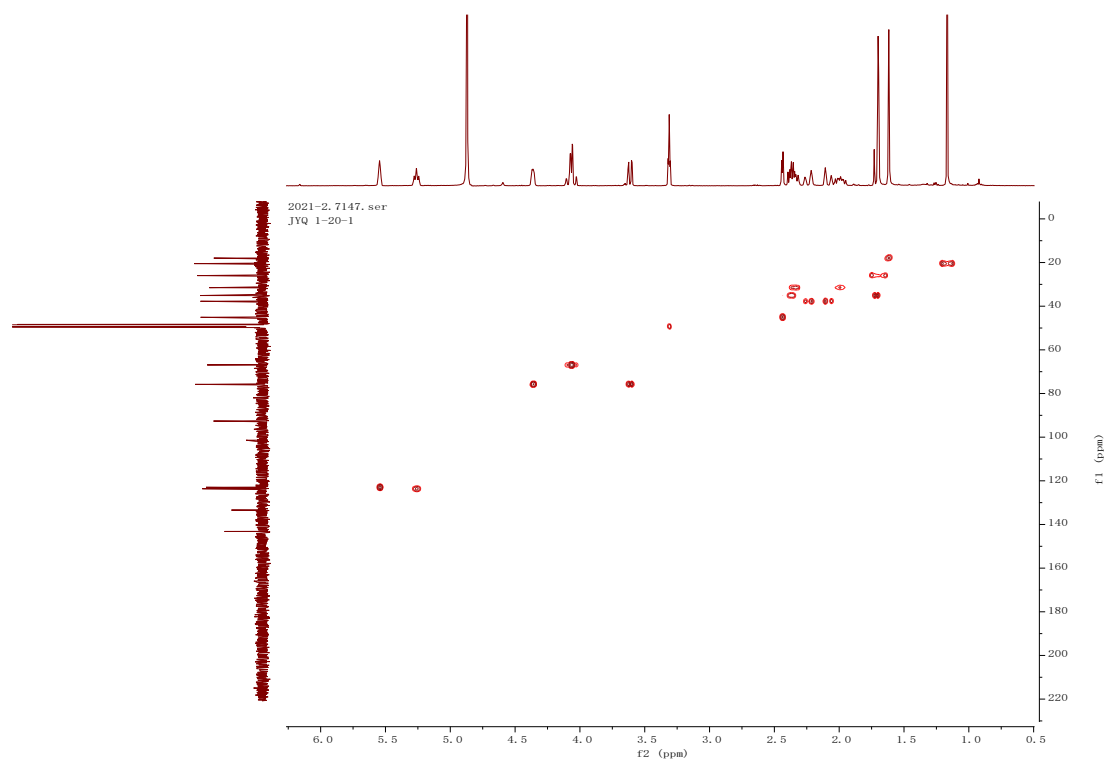

**Figure S14.** HSQC spectrum of compound **2** ( $\text{CD}_3\text{OD}$ ).

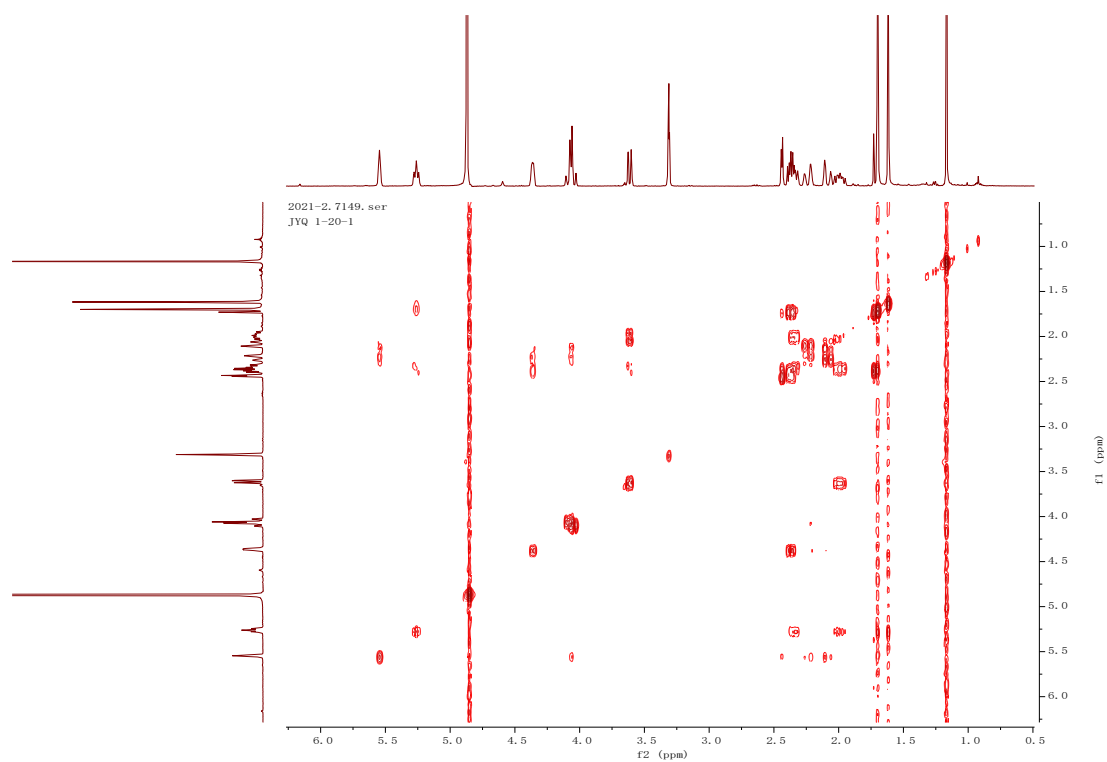

**Figure S15.**  $^1\text{H}$ - $^1\text{H}$  COSY spectrum of compound **2** ( $\text{CD}_3\text{OD}$ ).

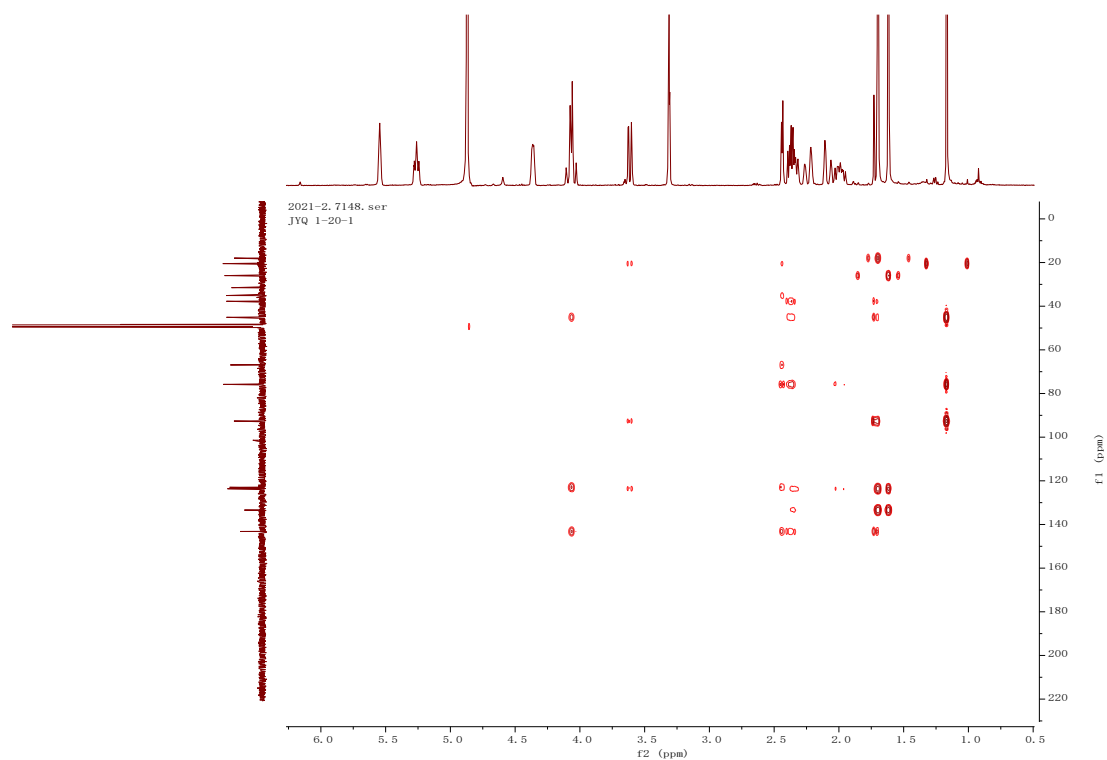

**Figure S16.** HMBC spectrum of compound **2** ( $\text{CD}_3\text{OD}$ ).

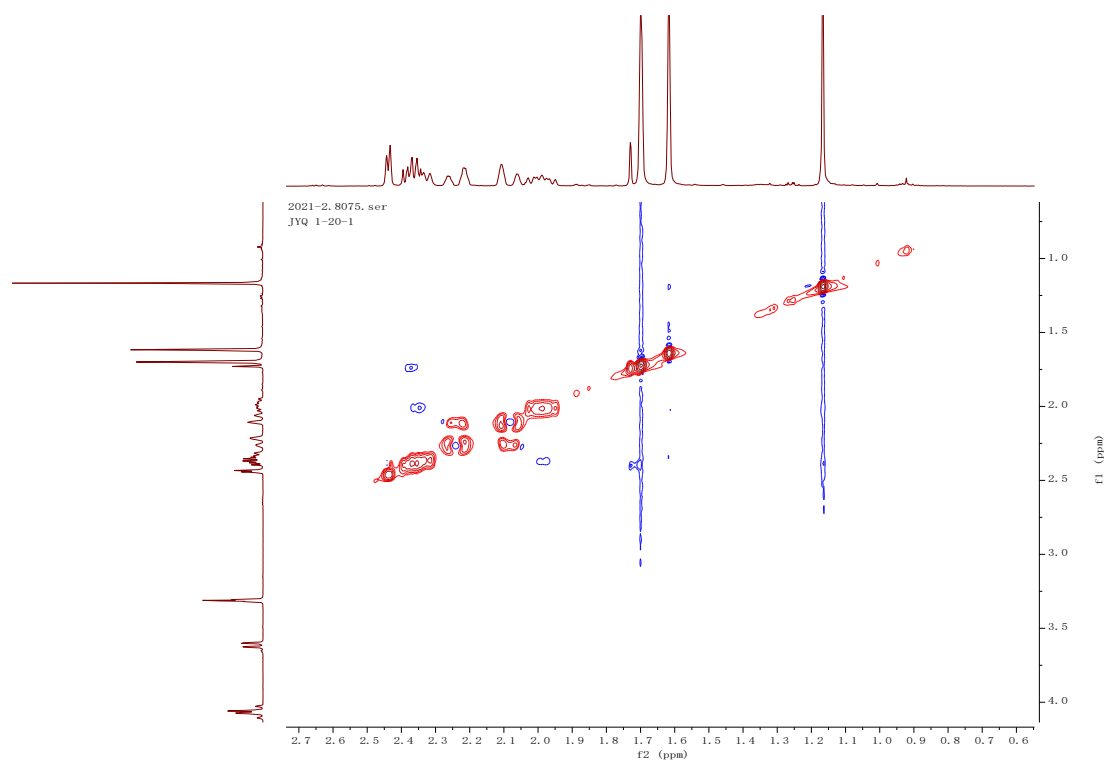

**Figure S17.** NOESY spectrum of compound **2** (CD<sub>3</sub>OD).

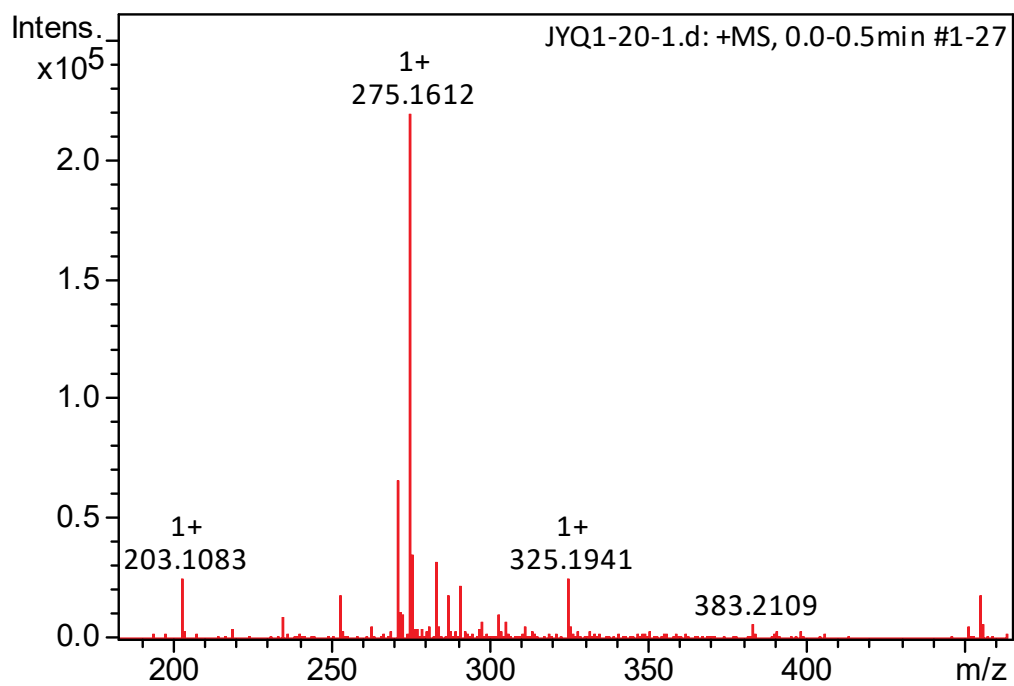

**Figure S18.** HRESIMS spectrum of compound **2**.

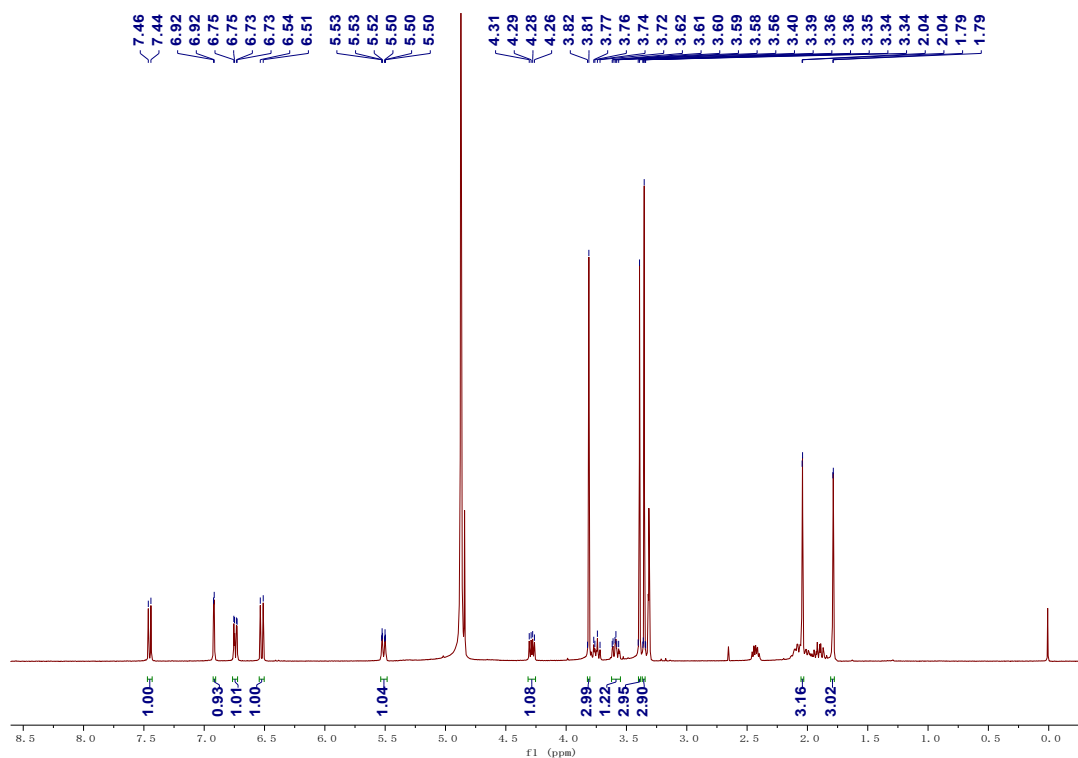

$^1\text{H}$  NMR spectrum of compound **3** (600 MHz,  $\text{CD}_3\text{OD}$ ).

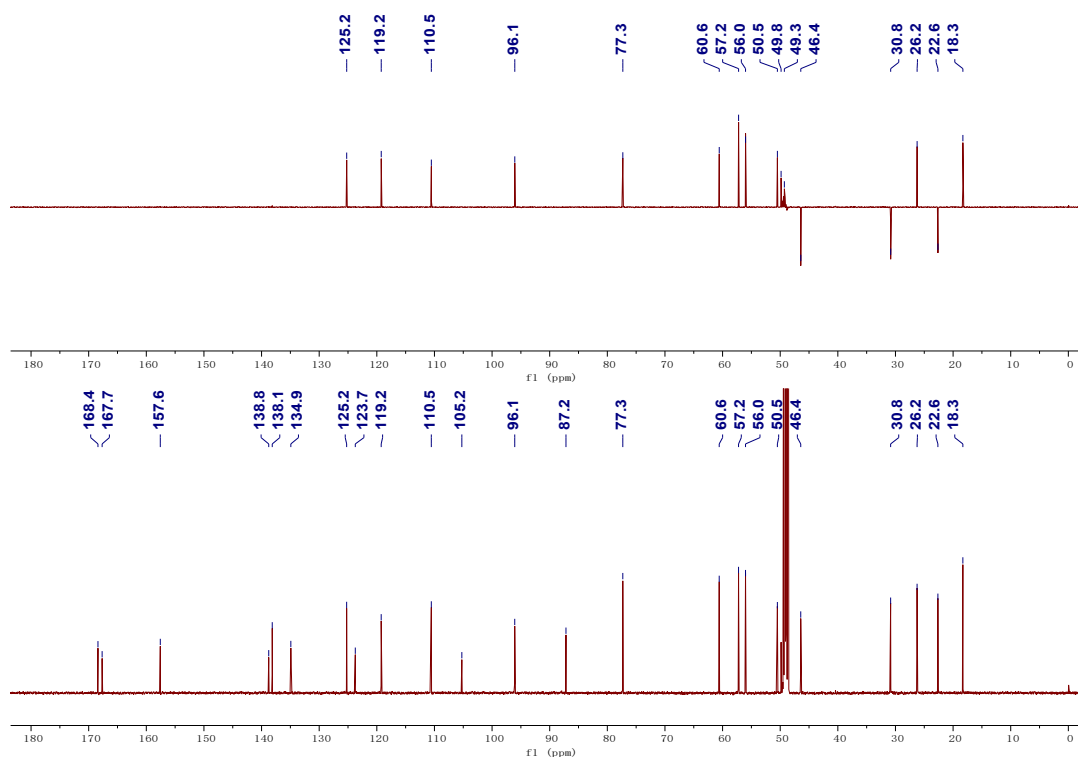

$^{13}\text{C}$  and DEPT NMR spectra of compound **3** (150 MHz,  $\text{CD}_3\text{OD}$ ).

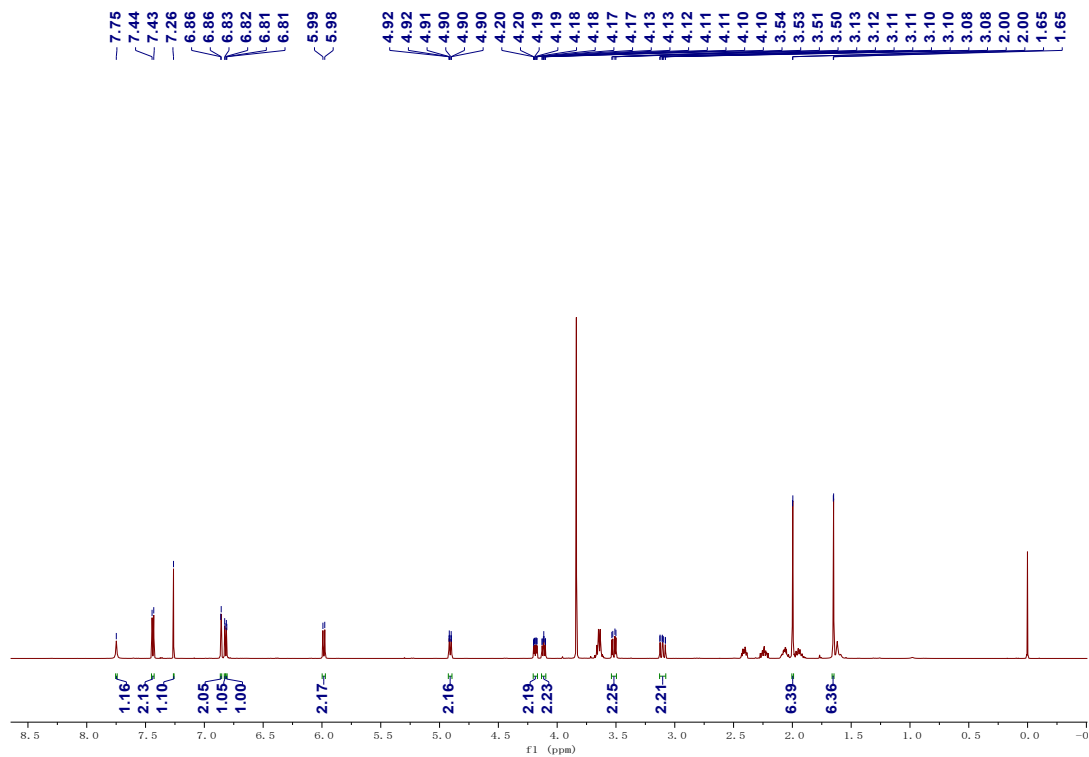

$^1\text{H}$  NMR spectrum of compound **4** (600 MHz,  $\text{CDCl}_3$ ).

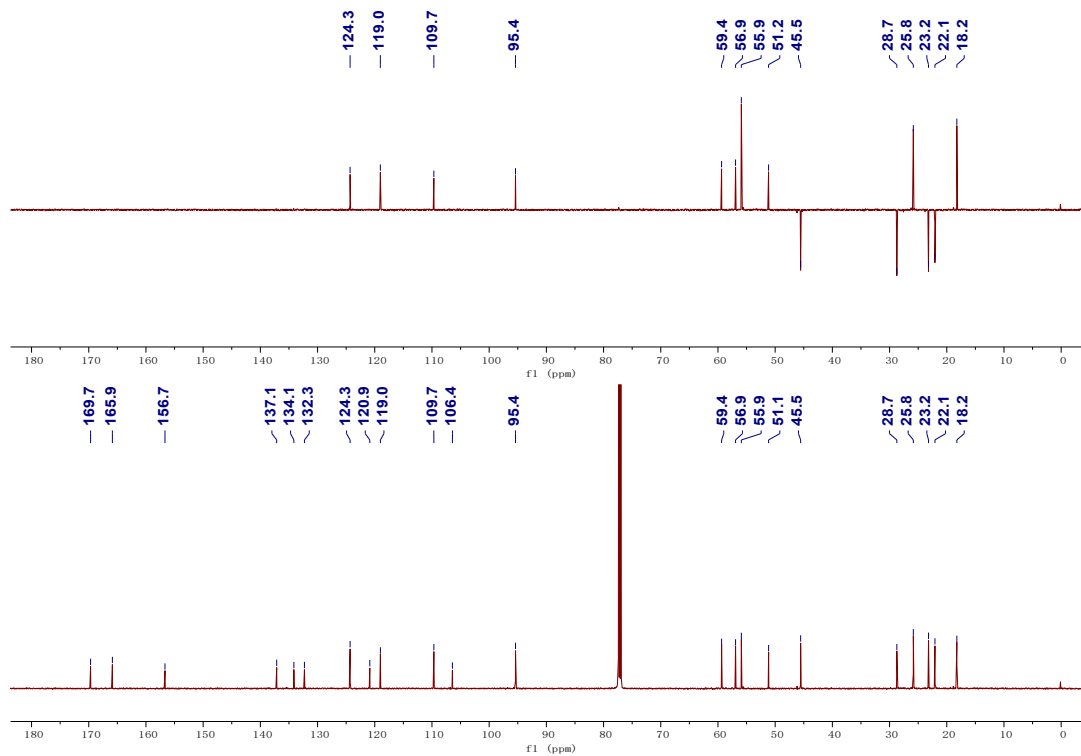

$^{13}\text{C}$  and DEPT NMR spectra of compound **4** (150 MHz,  $\text{CDCl}_3$ ).

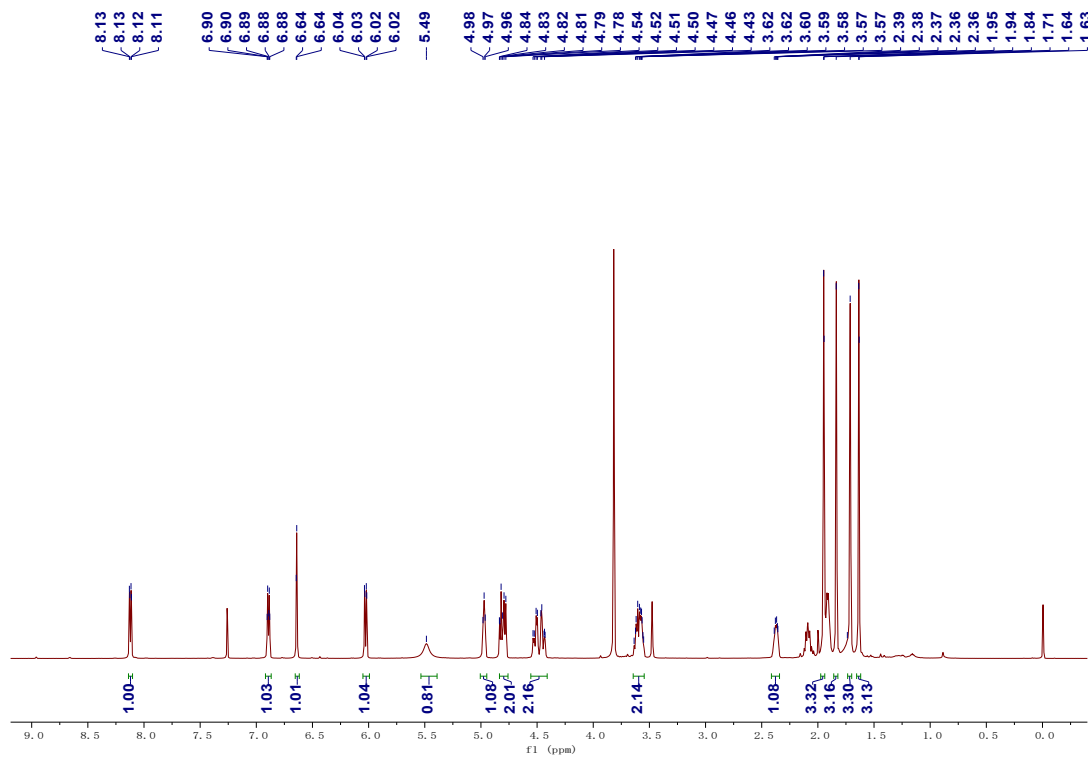

$^1\text{H}$  NMR spectrum of compound **5** (400 MHz,  $\text{CDCl}_3$ ).

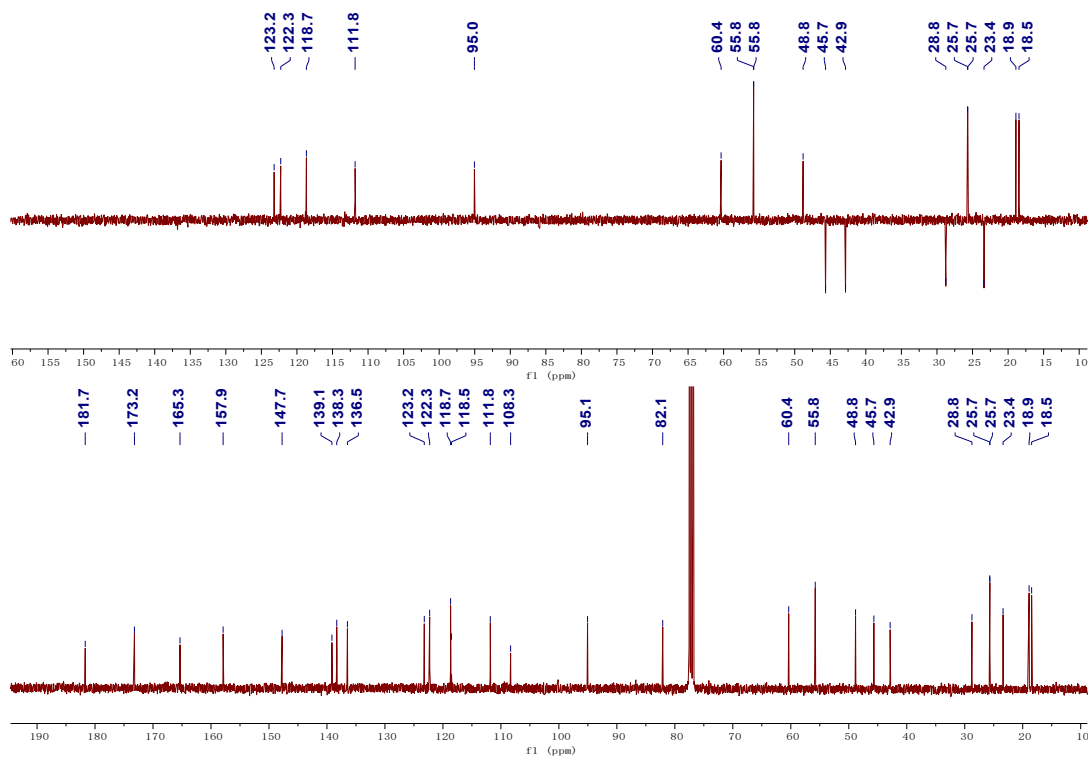

$^{13}\text{C}$  and DEPT NMR spectra of compound **5** (100 MHz,  $\text{CDCl}_3$ ).



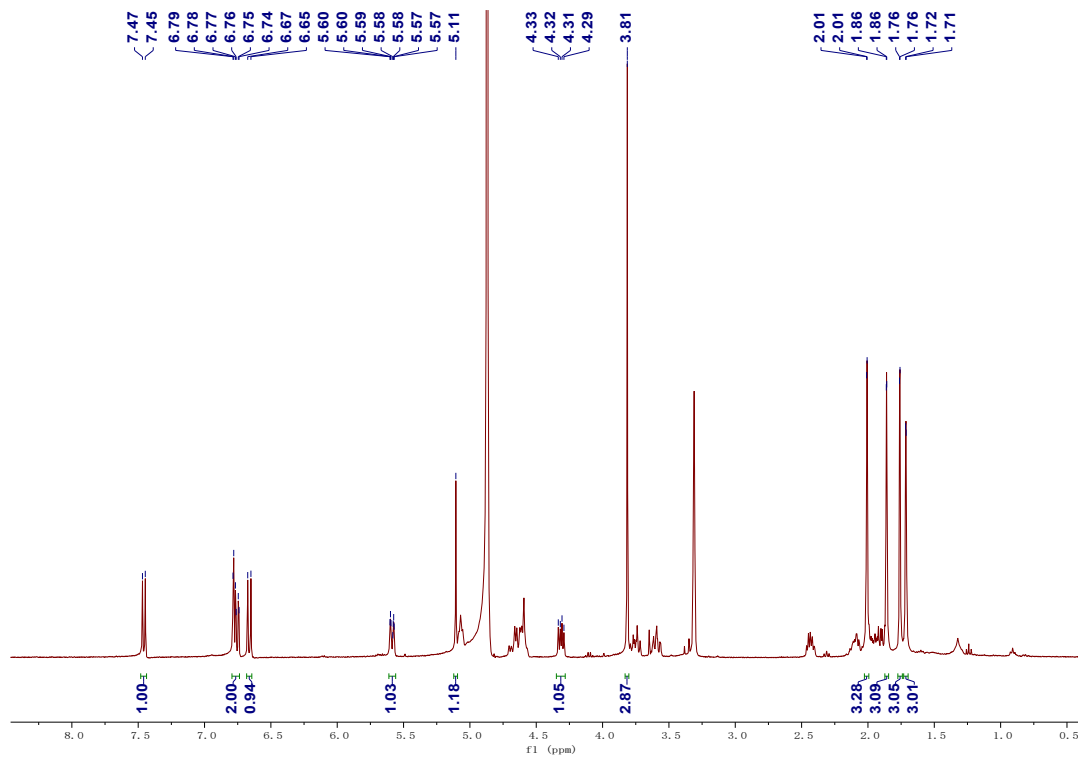

$^1\text{H}$  NMR spectrum of compound **6** (400 MHz,  $\text{CD}_3\text{OD}$ ).

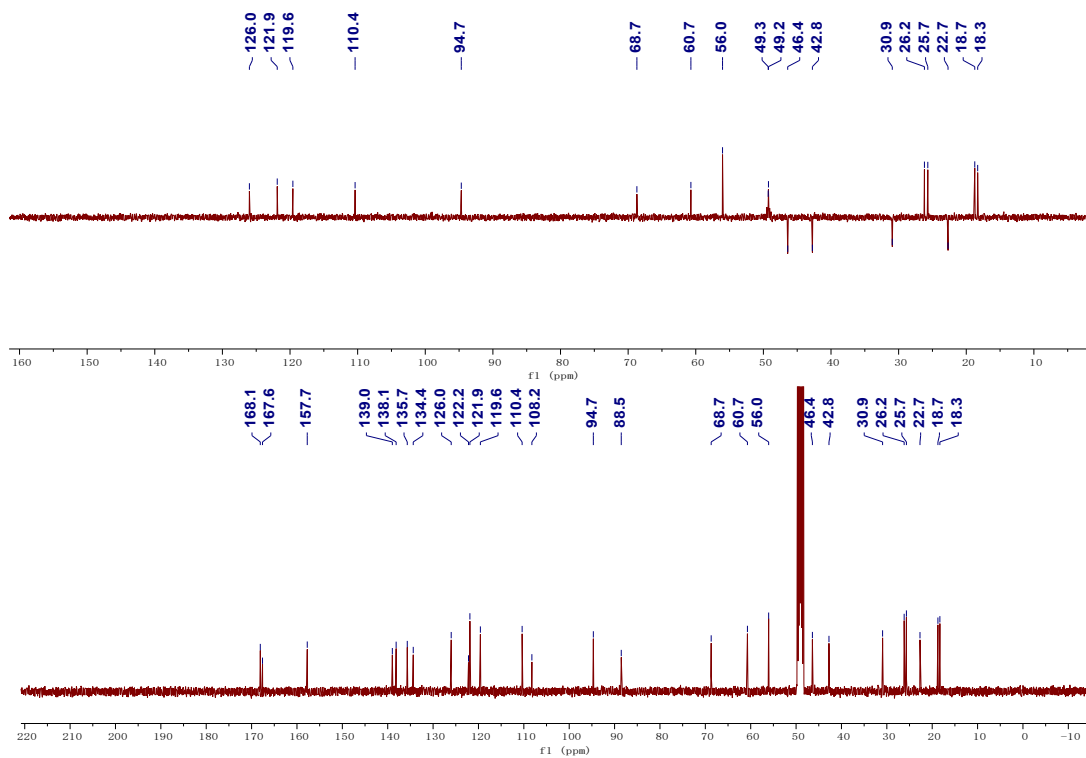

$^{13}\text{C}$  and DEPT NMR spectra of compound **6** (100 MHz,  $\text{CD}_3\text{OD}$ ).

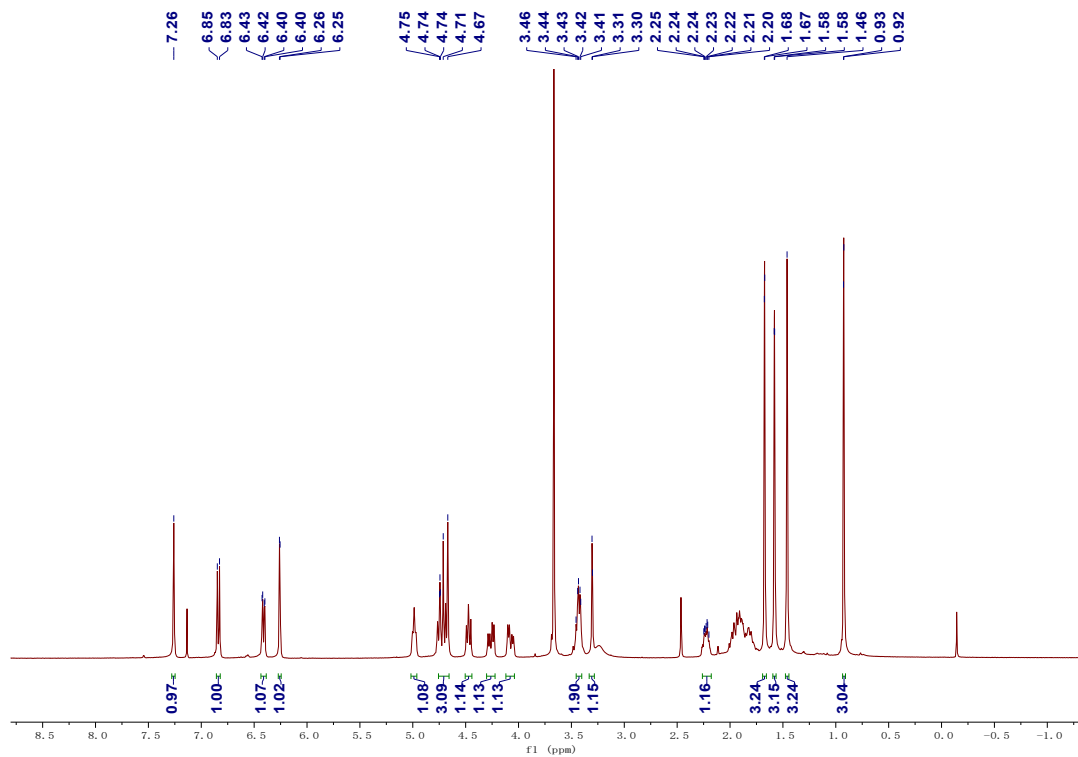

$^1\text{H}$  NMR spectrum of compound **7** (400 MHz,  $\text{CDCl}_3$ ).

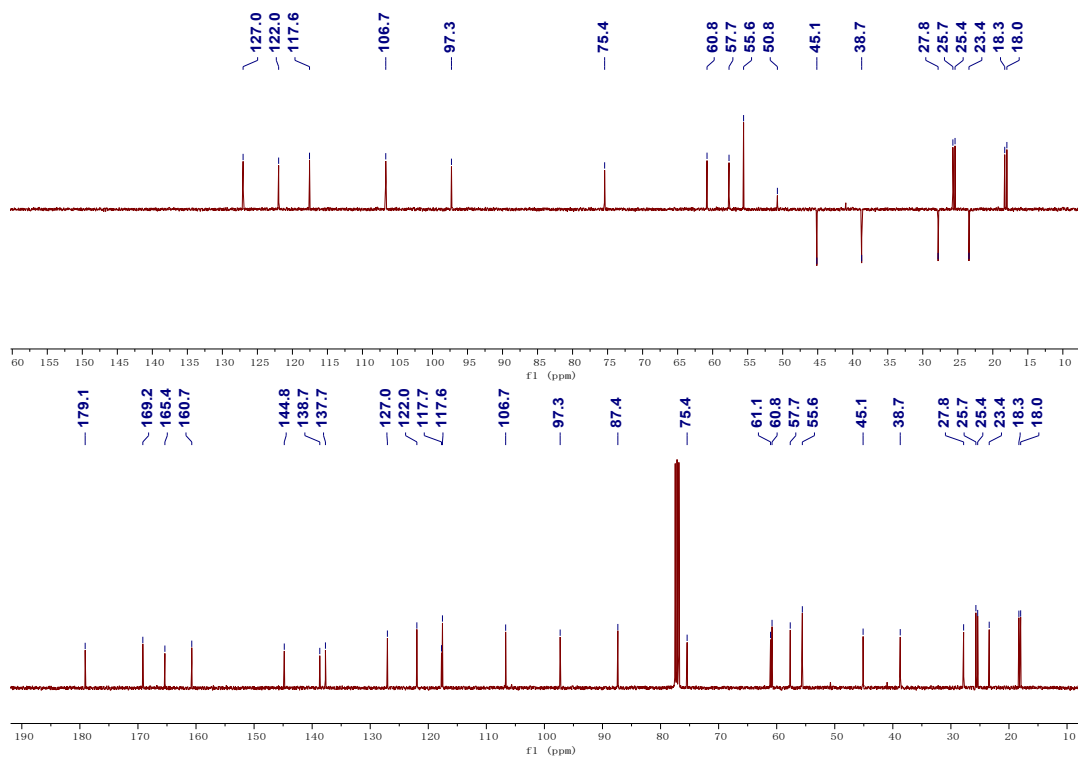

$^{13}\text{C}$  and DEPT NMR spectra of compound **7** (100 MHz,  $\text{CDCl}_3$ ).

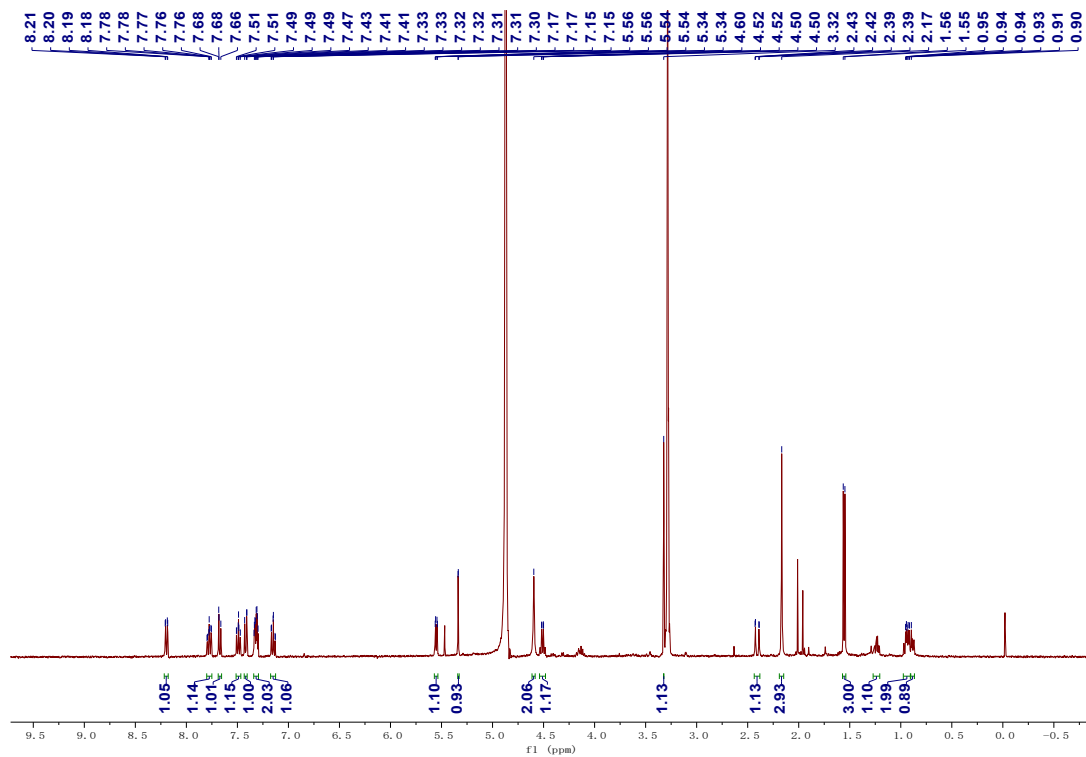

$^1\text{H}$  NMR spectrum of compound **8** (400 MHz,  $\text{CD}_3\text{OD}$ ).

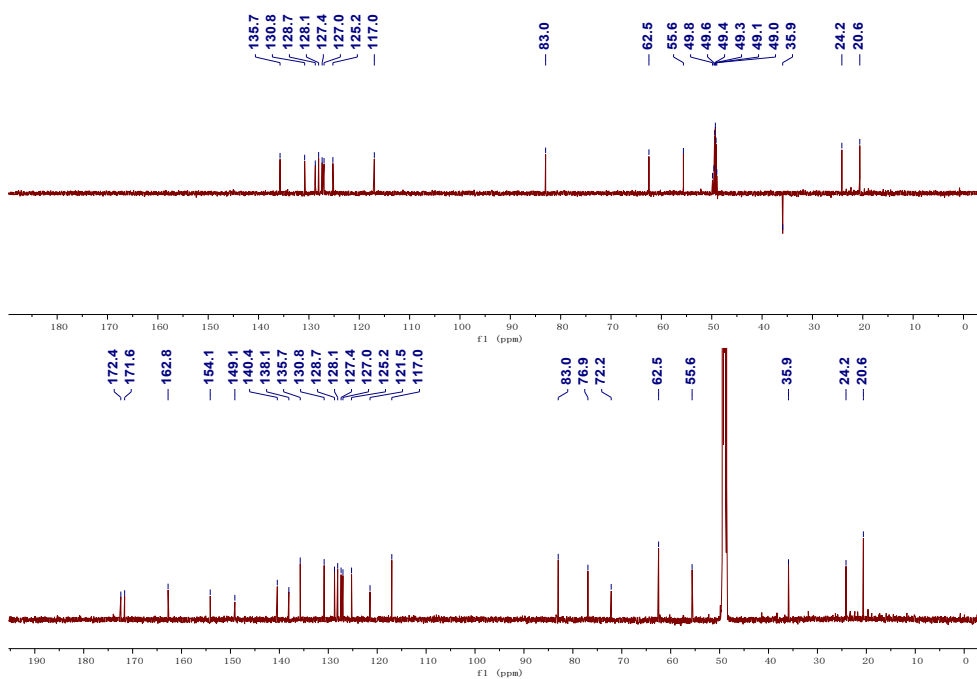

$^{13}\text{C}$  and DEPT NMR spectra of compound **8** (100 MHz,  $\text{CD}_3\text{OD}$ ).

**Figure S19.**  $^1\text{H}$  NMR,  $^{13}\text{C}$  and DEPT NMR spectra of compounds **3–8**

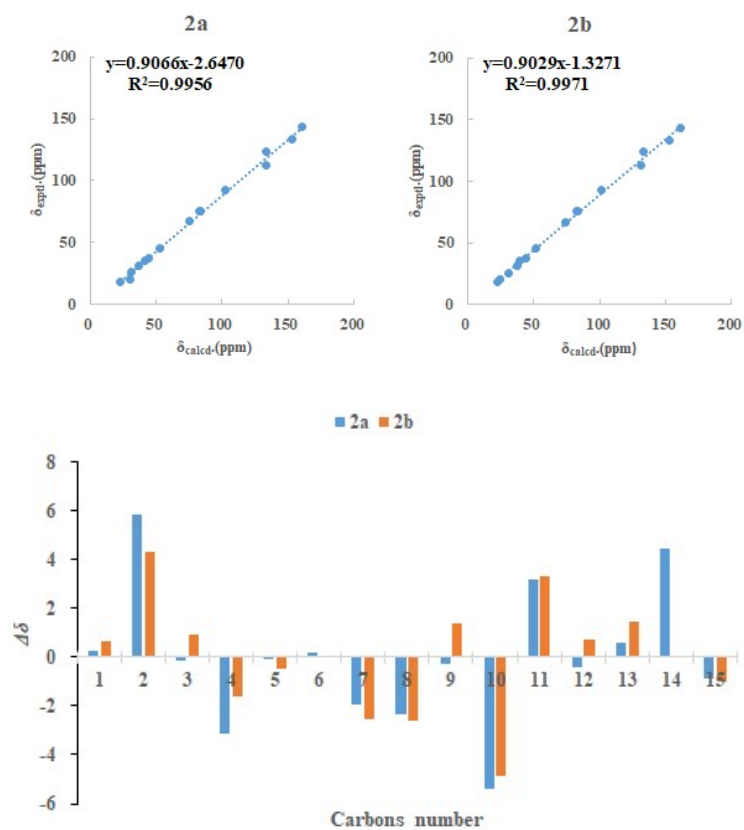

**Figure S20.** Linear correlation plots (A) and the relative errors (B) between the experimental and calculated  $^{13}\text{C}$  NMR chemical shifts of **2a** and **2b**.

### NMR calculation for compound 2

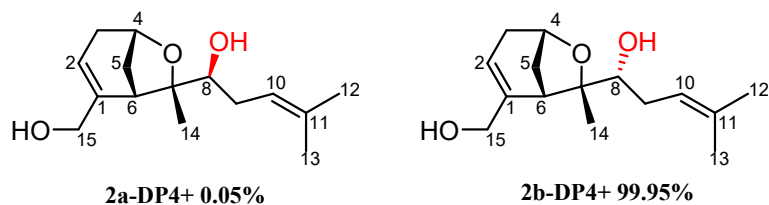

**Table S1.** Gibbs free energies<sup>a</sup> and equilibrium populations<sup>b</sup> of low-energy conformers of **2a**.

| Conformers | $\Delta G(\text{a.u.})$ | P(%) / 100 | G(a.u.)     |
|------------|-------------------------|------------|-------------|
| 2a-1       | 0.00322                 | 2.22       | -811.344912 |
| 2a-2       | 0.00195                 | 8.49       | -811.346178 |
| 2a-3       | 0.00243                 | 5.14       | -811.345703 |
| 2a-4       | 0.00264                 | 4.07       | -811.345484 |
| 2a-5       | 0.00198                 | 8.24       | -811.346149 |

|      |         |      |             |
|------|---------|------|-------------|
| 2a-6 | 0.0     | 67.1 | -811.348129 |
| 2a-7 | 0.00809 | 0.01 | -811.340039 |
| 2a-8 | 0.00266 | 4.02 | -811.345472 |
| 2a-9 | 0.00431 | 0.7  | -811.34382  |

<sup>a</sup>wB97M-V/def2-TZVP, in a.u.

<sup>b</sup>From  $\Delta G$  values at 298.15K.

**Table S2.** Cartesian coordinates for the low-energy reoptimized random reseach conformers of **2a** at B3LYP-D3(BJ)/6-31G\* level of theory in methanol.

| 2a-1          |               | Standard Orientation (A.U.) |           |           |           |
|---------------|---------------|-----------------------------|-----------|-----------|-----------|
| Center number | Atomic number | Atomic Type                 | X         | Y         | Z         |
| 0             | 6             | 0                           | -9.165582 | -2.548781 | 0.624846  |
| 1             | 6             | 0                           | -6.651709 | -3.504394 | 1.666015  |
| 2             | 6             | 0                           | -4.399039 | -1.602802 | 1.44356   |
| 3             | 8             | 0                           | -5.072555 | 0.28546   | 3.302118  |
| 4             | 6             | 0                           | -6.937671 | -0.703654 | 5.026653  |
| 5             | 6             | 0                           | -9.543956 | 0.355834  | 4.346209  |
| 6             | 6             | 0                           | 10.487693 | -0.808523 | 1.921225  |
| 7             | 6             | 0                           | 10.065047 | -3.585453 | -1.871726 |
| 8             | 8             | 0                           | -8.384135 | -3.027465 | -3.863852 |
| 9             | 6             | 0                           | -6.928866 | -3.560578 | 4.565169  |
| 10            | 6             | 0                           | -1.899078 | -2.898702 | 2.153598  |
| 11            | 6             | 0                           | -4.057171 | -0.225429 | -1.115762 |
| 12            | 6             | 0                           | -1.727035 | 1.533149  | -1.196276 |
| 13            | 6             | 0                           | -1.430731 | 2.800878  | -3.720199 |
| 14            | 6             | 0                           | -2.333174 | 5.069443  | -4.417526 |
| 15            | 6             | 0                           | -1.958804 | 6.052912  | -7.063553 |
| 16            | 6             | 0                           | -3.81963  | 6.788475  | -2.704929 |
| 17            | 8             | 0                           | -6.240966 | 1.185828  | -1.774869 |
| 18            | 1             | 0                           | -6.160484 | -5.337571 | 0.821445  |
| 19            | 1             | 0                           | -6.378178 | -0.154427 | 6.953326  |
| 20            | 1             | 0                           | -9.408295 | 2.433039  | 4.165536  |
| 21            | 1             | 0                           | 10.890006 | 0.008684  | 5.908687  |
| 22            | 1             | 0                           | 12.304556 | -0.150783 | 1.176928  |
| 23            | 1             | 0                           | 10.197322 | -5.667984 | -1.762453 |
| 24            | 1             | 0                           | 12.000171 | -2.873727 | -2.250767 |
| 25            | 1             | 0                           | -7.92561  | -1.253159 | -3.650248 |
| 26            | 1             | 0                           | -5.342822 | -4.49573  | 5.518187  |
| 27            | 1             | 0                           | -8.689815 | -4.473726 | 5.178235  |

|    |   |   |           |           |           |
|----|---|---|-----------|-----------|-----------|
| 28 | 1 | 0 | -2.124349 | -4.232276 | 3.724892  |
| 29 | 1 | 0 | -1.135973 | -3.953244 | 0.529466  |
| 30 | 1 | 0 | -0.504144 | -1.477913 | 2.73536   |
| 31 | 1 | 0 | -3.866628 | -1.693834 | -2.579657 |
| 32 | 1 | 0 | -1.921373 | 2.911589  | 0.350962  |
| 33 | 1 | 0 | -0.012352 | 0.427163  | -0.804228 |
| 34 | 1 | 0 | -0.432681 | 1.689374  | -5.158954 |
| 35 | 1 | 0 | -3.796234 | 6.429431  | -7.981924 |
| 36 | 1 | 0 | -0.92611  | 7.868175  | -7.053568 |
| 37 | 1 | 0 | -0.90584  | 4.711057  | -8.252472 |
| 38 | 1 | 0 | -5.801675 | 6.89869   | -3.349345 |
| 39 | 1 | 0 | -3.838798 | 6.154444  | -0.729948 |
| 40 | 1 | 0 | -3.061347 | 8.731783  | -2.762032 |
| 41 | 1 | 0 | -6.890283 | 1.894318  | -0.213822 |

| 2a-2          |               | Standard Orientation (A.U.) |           |           |           |
|---------------|---------------|-----------------------------|-----------|-----------|-----------|
| Center number | Atomic number | Atomic Type                 | X         | Y         | Z         |
| 0             | 6             | 0                           | -8.721166 | -3.093172 | 0.130622  |
| 1             | 6             | 0                           | -6.522535 | -3.630873 | 1.896593  |
| 2             | 6             | 0                           | -4.513789 | -1.463224 | 1.869286  |
| 3             | 8             | 0                           | -5.799283 | 0.506431  | 3.264515  |
| 4             | 6             | 0                           | -7.916404 | -0.529113 | 4.65069   |
| 5             | 6             | 0                           | 10.384469 | 0.043519  | 3.25428   |
| 6             | 6             | 0                           | 10.523207 | -1.447172 | 0.827561  |
| 7             | 6             | 0                           | -8.656664 | -4.211086 | -2.509329 |
| 8             | 8             | 0                           | -9.312254 | -2.459388 | -4.390724 |
| 9             | 6             | 0                           | -7.477076 | -3.386686 | 4.627918  |
| 10            | 6             | 0                           | -2.100681 | -2.286393 | 3.248738  |
| 11            | 6             | 0                           | -3.824883 | -0.343371 | -0.764583 |
| 12            | 6             | 0                           | -1.568157 | 1.512015  | -0.693199 |
| 13            | 6             | 0                           | -0.961458 | 2.569351  | -3.257662 |
| 14            | 6             | 0                           | -1.840759 | 4.721831  | -4.277834 |
| 15            | 6             | 0                           | -1.124989 | 5.497211  | -6.922233 |
| 16            | 6             | 0                           | -3.62181  | 6.503175  | -2.953846 |
| 17            | 8             | 0                           | -5.927558 | 0.888066  | -1.873348 |
| 18            | 1             | 0                           | -5.647956 | -5.470357 | 1.47547   |
| 19            | 1             | 0                           | -7.899236 | 0.321775  | 6.548246  |
| 20            | 1             | 0                           | 10.480717 | 2.091872  | 2.849998  |
| 21            | 1             | 0                           | 12.017143 | -0.360561 | 4.497491  |

|    |   |   |           |           |           |
|----|---|---|-----------|-----------|-----------|
| 22 | 1 | 0 | 12.046365 | -1.013953 | -0.502699 |
| 23 | 1 | 0 | -6.749826 | -5.032237 | -2.831951 |
| 24 | 1 | 0 | -9.994607 | -5.808934 | -2.65623  |
| 25 | 1 | 0 | -8.260678 | -0.985039 | -4.0457   |
| 26 | 1 | 0 | -6.06921  | -3.971173 | 6.03418   |
| 27 | 1 | 0 | -9.222358 | -4.462563 | 4.95453   |
| 28 | 1 | 0 | -1.016957 | -0.625687 | 3.857715  |
| 29 | 1 | 0 | -2.523489 | -3.410672 | 4.939391  |
| 30 | 1 | 0 | -0.90008  | -3.441703 | 2.000735  |
| 31 | 1 | 0 | -3.33681  | -1.934544 | -2.021739 |
| 32 | 1 | 0 | -2.029999 | 3.014156  | 0.672348  |
| 33 | 1 | 0 | 0.113319  | 0.532496  | 0.035474  |
| 34 | 1 | 0 | 0.27853   | 1.393278  | -4.432921 |
| 35 | 1 | 0 | -0.180475 | 7.359722  | -6.929511 |
| 36 | 1 | 0 | 0.144935  | 4.11932   | -7.823278 |
| 37 | 1 | 0 | -2.82306  | 5.696158  | -8.121353 |
| 38 | 1 | 0 | -5.493964 | 6.456878  | -3.874841 |
| 39 | 1 | 0 | -3.900286 | 6.042287  | -0.95061  |
| 40 | 1 | 0 | -2.937101 | 8.469913  | -3.084729 |
| 41 | 1 | 0 | -6.802455 | 1.701777  | -0.479148 |

| 2a-3          |               | Standard Orientation (A.U.) |           |           |           |
|---------------|---------------|-----------------------------|-----------|-----------|-----------|
| Center number | Atomic number | Atomic Type                 | X         | Y         | Z         |
| 0             | 6             | 0                           | -8.232748 | -3.795671 | -0.213832 |
| 1             | 6             | 0                           | -7.047691 | -2.213163 | 1.87917   |
| 2             | 6             | 0                           | -6.475763 | 0.547298  | 1.047254  |
| 3             | 8             | 0                           | -8.966423 | 1.722894  | 1.104596  |
| 4             | 6             | 0                           | 10.747167 | 0.095611  | 2.338479  |
| 5             | 6             | 0                           | 12.263599 | -1.396565 | 0.368954  |
| 6             | 6             | 0                           | 10.668348 | -3.429925 | -0.827693 |
| 7             | 6             | 0                           | -6.614755 | -5.66108  | -1.644912 |
| 8             | 8             | 0                           | -4.583816 | -6.489318 | -0.110734 |
| 9             | 6             | 0                           | -9.105357 | -1.723755 | 3.874461  |
| 10            | 6             | 0                           | -4.780453 | 1.951024  | 2.921056  |
| 11            | 6             | 0                           | -5.573633 | 0.863668  | -1.708035 |
| 12            | 6             | 0                           | -2.921671 | -0.160901 | -2.338312 |
| 13            | 6             | 0                           | -0.66789  | 1.203845  | -1.253431 |
| 14            | 6             | 0                           | 0.475454  | 3.267478  | -2.194522 |
| 15            | 6             | 0                           | 2.749641  | 4.394642  | -0.900963 |

|    |   |   |           |           |           |
|----|---|---|-----------|-----------|-----------|
| 16 | 6 | 0 | -0.365967 | 4.640485  | -4.53914  |
| 17 | 8 | 0 | -5.708971 | 3.44158   | -2.397356 |
| 18 | 1 | 0 | -5.362183 | -3.161391 | 2.618703  |
| 19 | 1 | 0 | -12.00334 | 1.286871  | 3.493002  |
| 20 | 1 | 0 | 12.951504 | -0.066836 | -1.086352 |
| 21 | 1 | 0 | 13.969251 | -2.227619 | 1.24891   |
| 22 | 1 | 0 | 11.551267 | -4.605564 | -2.288192 |
| 23 | 1 | 0 | -7.809033 | -7.261001 | -2.274194 |
| 24 | 1 | 0 | -5.884079 | -4.733671 | -3.377424 |
| 25 | 1 | 0 | -3.431311 | -7.449466 | -1.146937 |
| 26 | 1 | 0 | -8.34036  | -0.818642 | 5.578003  |
| 27 | 1 | 0 | 10.110666 | -3.453885 | 4.43038   |
| 28 | 1 | 0 | -4.375291 | 3.849613  | 2.187421  |
| 29 | 1 | 0 | -5.721802 | 2.141921  | 4.761266  |
| 30 | 1 | 0 | -2.976257 | 0.965866  | 3.200614  |
| 31 | 1 | 0 | -6.926248 | -0.22717  | -2.866699 |
| 32 | 1 | 0 | -2.853143 | -2.148478 | -1.727695 |
| 33 | 1 | 0 | -2.793255 | -0.176458 | -4.417903 |
| 34 | 1 | 0 | 0.137811  | 0.39321   | 0.47323   |
| 35 | 1 | 0 | 4.392431  | 4.455267  | -2.189516 |
| 36 | 1 | 0 | 2.378136  | 6.370074  | -0.334488 |
| 37 | 1 | 0 | 3.295504  | 3.325343  | 0.797182  |
| 38 | 1 | 0 | -2.017052 | 3.775584  | -5.441099 |
| 39 | 1 | 0 | -0.90012  | 6.600126  | -4.062414 |
| 40 | 1 | 0 | 1.198137  | 4.764348  | -5.917809 |
| 41 | 1 | 0 | -7.355927 | 4.009579  | -1.828213 |

| 2a-4          |               | Standard Orientation (A.U.) |           |           |           |
|---------------|---------------|-----------------------------|-----------|-----------|-----------|
| Center number | Atomic number | Atomic Type                 | X         | Y         | Z         |
| 0             | 6             | 0                           | -9.184493 | -2.770902 | 0.405478  |
| 1             | 6             | 0                           | -6.352401 | -3.309735 | 0.47958   |
| 2             | 6             | 0                           | -4.63646  | -0.929453 | 0.833058  |
| 3             | 8             | 0                           | -5.12865  | -0.266132 | 3.44104   |
| 4             | 6             | 0                           | -6.24814  | -2.372161 | 4.759816  |
| 5             | 6             | 0                           | -9.091026 | -1.922369 | 5.063164  |
| 6             | 6             | 0                           | 10.413053 | -2.187696 | 2.551734  |
| 7             | 6             | 0                           | 10.508222 | -2.865733 | -2.114313 |
| 8             | 8             | 0                           | -9.586048 | -1.021143 | -3.807393 |
| 9             | 6             | 0                           | -5.831524 | -4.643907 | 3.016045  |



|    |   |   |           |           |           |
|----|---|---|-----------|-----------|-----------|
| 10 | 6 | 0 | -1.844666 | -1.619716 | 0.462263  |
| 11 | 6 | 0 | -5.260271 | 1.416495  | -0.794829 |
| 12 | 6 | 0 | -3.372691 | 3.639699  | -0.497957 |
| 13 | 6 | 0 | -1.070913 | 3.553802  | -2.177247 |
| 14 | 6 | 0 | -1.056205 | 3.956992  | -4.687347 |
| 15 | 6 | 0 | 1.350087  | 3.797044  | -6.200945 |
| 16 | 6 | 0 | -3.390721 | 4.577945  | -6.197388 |
| 17 | 8 | 0 | -7.741275 | 2.319471  | -0.297949 |
| 18 | 1 | 0 | -5.771494 | -4.402103 | -1.189222 |
| 19 | 1 | 0 | -5.308617 | -2.539452 | 6.608239  |
| 20 | 1 | 0 | -9.39663  | -0.015078 | 5.859782  |
| 21 | 1 | 0 | -9.885182 | -3.255856 | 6.465002  |
| 22 | 1 | 0 | 12.450873 | -1.826349 | 2.490107  |
| 23 | 1 | 0 | 10.187204 | -4.722785 | -3.015906 |
| 24 | 1 | 0 | 12.574567 | -2.686322 | -1.810722 |
| 25 | 1 | 0 | -9.435769 | 0.530018  | -2.820658 |
| 26 | 1 | 0 | -3.903236 | -5.390632 | 3.162292  |
| 27 | 1 | 0 | -7.163935 | -6.191791 | 3.389063  |
| 28 | 1 | 0 | -0.636849 | -0.199822 | 1.370678  |
| 29 | 1 | 0 | -1.379917 | -3.457687 | 1.301403  |
| 30 | 1 | 0 | -1.368522 | -1.685835 | -1.55984  |
| 31 | 1 | 0 | -5.270553 | 0.798113  | -2.779323 |
| 32 | 1 | 0 | -4.496044 | 5.336255  | -0.930337 |
| 33 | 1 | 0 | -2.823725 | 3.800786  | 1.502816  |
| 34 | 1 | 0 | 0.737577  | 3.110536  | -1.274428 |
| 35 | 1 | 0 | 1.192975  | 2.356706  | -7.705024 |
| 36 | 1 | 0 | 1.749051  | 5.606491  | -7.164001 |
| 37 | 1 | 0 | 2.988136  | 3.318245  | -5.013194 |
| 38 | 1 | 0 | -3.075002 | 6.276277  | -7.368265 |
| 39 | 1 | 0 | -3.848034 | 3.029812  | -7.521604 |
| 40 | 1 | 0 | -5.06707  | 4.911427  | -5.020232 |
| 41 | 1 | 0 | -8.015757 | 2.108707  | 1.503016  |

| 2a-5          |               | Standard Orientation (A.U.) |           |           |          |
|---------------|---------------|-----------------------------|-----------|-----------|----------|
| Center number | Atomic number | Atomic Type                 | X         | Y         | Z        |
| 0             | 6             | 0                           | -8.923009 | -0.616025 | 0.938653 |
| 1             | 6             | 0                           | -7.323471 | -3.00119  | 1.162959 |
| 2             | 6             | 0                           | -4.402273 | -2.588805 | 1.101791 |
| 3             | 8             | 0                           | -3.84024  | -1.656785 | 3.593892 |

|    |   |   |           |           |           |
|----|---|---|-----------|-----------|-----------|
| 4  | 6 | 0 | -6.013609 | -1.896483 | 5.192709  |
| 5  | 6 | 0 | -7.490931 | 0.600767  | 5.277801  |
| 6  | 6 | 0 | -8.980959 | 1.010084  | 2.88632   |
| 7  | 6 | 0 | 10.485464 | -0.250736 | -1.415399 |
| 8  | 8 | 0 | -9.070642 | 0.302089  | -3.60994  |
| 9  | 6 | 0 | -7.606833 | -3.939071 | 3.910153  |
| 10 | 6 | 0 | -3.034024 | -5.114458 | 0.674056  |
| 11 | 6 | 0 | -3.283655 | -0.695902 | -0.82657  |
| 12 | 6 | 0 | -3.687779 | 2.144878  | -0.410387 |
| 13 | 6 | 0 | -2.016393 | 3.618872  | -2.175891 |
| 14 | 6 | 0 | -2.707038 | 4.929355  | -4.248352 |
| 15 | 6 | 0 | -0.762857 | 6.312976  | -5.807261 |
| 16 | 6 | 0 | -5.396408 | 5.23992   | -5.142802 |
| 17 | 8 | 0 | -4.153484 | -1.446674 | -3.274896 |
| 18 | 1 | 0 | -7.898287 | -4.405191 | -0.255195 |
| 19 | 1 | 0 | -5.34038  | -2.417604 | 7.090919  |
| 20 | 1 | 0 | -6.144794 | 2.16575   | 5.588824  |
| 21 | 1 | 0 | -8.776397 | 0.612682  | 6.927482  |
| 22 | 1 | 0 | 10.167566 | 2.703161  | 2.769815  |
| 23 | 1 | 0 | 11.639861 | -1.983685 | -1.705637 |
| 24 | 1 | 0 | 11.822018 | 1.321003  | -1.129669 |
| 25 | 1 | 0 | -7.487362 | -0.652705 | -3.587199 |
| 26 | 1 | 0 | -6.793912 | -5.825991 | 4.202096  |
| 27 | 1 | 0 | -9.584671 | -3.958981 | 4.54197   |
| 28 | 1 | 0 | -3.167803 | -5.662857 | -1.325587 |
| 29 | 1 | 0 | -1.027953 | -4.894519 | 1.174514  |
| 30 | 1 | 0 | -3.817478 | -6.640097 | 1.842853  |
| 31 | 1 | 0 | -1.216481 | -1.012552 | -0.739159 |
| 32 | 1 | 0 | -5.679282 | 2.629154  | -0.677733 |
| 33 | 1 | 0 | -3.188935 | 2.563798  | 1.564575  |
| 34 | 1 | 0 | 0.008976  | 3.559217  | -1.724092 |
| 35 | 1 | 0 | 1.161288  | 6.083101  | -5.053837 |
| 36 | 1 | 0 | -0.779016 | 5.648102  | -7.785925 |
| 37 | 1 | 0 | -1.195565 | 8.354613  | -5.877071 |
| 38 | 1 | 0 | -6.070106 | 7.174604  | -4.733229 |
| 39 | 1 | 0 | -5.497432 | 5.022508  | -7.214918 |
| 40 | 1 | 0 | -6.727821 | 3.886246  | -4.307256 |
| 41 | 1 | 0 | -3.390734 | -0.286527 | -4.475097 |

|      |                             |
|------|-----------------------------|
| 2a-6 | Standard Orientation (A.U.) |
|------|-----------------------------|

| Center number | Atomic number | Atomic Type | X         | Y         | Z         |
|---------------|---------------|-------------|-----------|-----------|-----------|
| 0             | 6             | 0           | -9.196285 | -2.467155 | 0.188795  |
| 1             | 6             | 0           | -6.793036 | -3.527475 | 1.377842  |
| 2             | 6             | 0           | -4.471252 | -1.697516 | 1.352145  |
| 3             | 8             | 0           | -5.208553 | 0.171674  | 3.205345  |
| 4             | 6             | 0           | -7.220358 | -0.787275 | 4.773136  |
| 5             | 6             | 0           | -9.735376 | 0.375922  | 3.93767   |
| 6             | 6             | 0           | 10.546183 | -0.706649 | 1.427817  |
| 7             | 6             | 0           | -9.955289 | -3.433318 | -2.381074 |
| 8             | 8             | 0           | -8.108472 | -2.931116 | -4.23655  |
| 9             | 6             | 0           | -7.271784 | -3.633056 | 4.24937   |
| 10            | 6             | 0           | -2.068601 | -3.092572 | 2.20072   |
| 11            | 6             | 0           | -3.906841 | -0.278118 | -1.143369 |
| 12            | 6             | 0           | -1.539802 | 1.426763  | -0.999559 |
| 13            | 6             | 0           | -1.048205 | 2.793026  | -3.440812 |
| 14            | 6             | 0           | -1.879927 | 5.099427  | -4.101179 |
| 15            | 6             | 0           | -1.307814 | 6.193332  | -6.667356 |
| 16            | 6             | 0           | -3.473765 | 6.758828  | -2.426073 |
| 17            | 8             | 0           | -6.00185  | 1.192131  | -1.943534 |
| 18            | 1             | 0           | -6.303187 | -5.358305 | 0.527572  |
| 19            | 1             | 0           | -6.779357 | -0.296594 | 6.745893  |
| 20            | 1             | 0           | -9.515804 | 2.449981  | 3.812229  |
| 21            | 1             | 0           | 11.198956 | 0.04579   | 5.394642  |
| 22            | 1             | 0           | 12.284288 | 0.028162  | 0.575301  |
| 23            | 1             | 0           | 10.186134 | -5.509021 | -2.310755 |
| 24            | 1             | 0           | 11.824037 | -2.631542 | -2.890477 |
| 25            | 1             | 0           | -7.600388 | -1.177131 | -3.972953 |
| 26            | 1             | 0           | -5.785574 | -4.638977 | 5.287434  |
| 27            | 1             | 0           | -9.099037 | -4.499038 | 4.720218  |
| 28            | 1             | 0           | -2.448571 | -4.4456   | 3.724512  |
| 29            | 1             | 0           | -1.231812 | -4.14295  | 0.610506  |
| 30            | 1             | 0           | -0.668918 | -1.73492  | 2.908554  |
| 31            | 1             | 0           | -3.632981 | -1.721432 | -2.619113 |
| 32            | 1             | 0           | -1.805696 | 2.747211  | 0.587104  |
| 33            | 1             | 0           | 0.11972   | 0.263095  | -0.54226  |
| 34            | 1             | 0           | 0.042164  | 1.732318  | -4.850413 |
| 35            | 1             | 0           | -0.175568 | 4.896523  | -7.833187 |
| 36            | 1             | 0           | -3.071405 | 6.622288  | -7.700565 |
| 37            | 1             | 0           | -0.271158 | 7.998723  | -6.501964 |
| 38            | 1             | 0           | -3.654407 | 6.032099  | -0.491526 |

|    |   |   |           |          |           |
|----|---|---|-----------|----------|-----------|
| 39 | 1 | 0 | -2.689577 | 8.690351 | -2.330994 |
| 40 | 1 | 0 | -5.398059 | 6.931007 | -3.215685 |
| 41 | 1 | 0 | -6.748124 | 1.90941  | -0.431298 |

| 2a-7          |               | Standard Orientation (A.U.) |           |           |           |
|---------------|---------------|-----------------------------|-----------|-----------|-----------|
| Center number | Atomic number | Atomic Type                 | X         | Y         | Z         |
| 0             | 6             | 0                           | -8.154204 | -3.48369  | 0.257564  |
| 1             | 6             | 0                           | -5.502976 | -3.145309 | 1.304478  |
| 2             | 6             | 0                           | -4.673929 | -0.308696 | 1.334818  |
| 3             | 8             | 0                           | -6.148597 | 0.682955  | 3.414002  |
| 4             | 6             | 0                           | -7.120661 | -1.354989 | 4.954769  |
| 5             | 6             | 0                           | -9.905313 | -1.825767 | 4.325501  |
| 6             | 6             | 0                           | 10.161188 | -2.936539 | 1.711709  |
| 7             | 6             | 0                           | -8.454927 | -4.138139 | -2.518056 |
| 8             | 8             | 0                           | 10.288432 | -2.65478  | -3.73575  |
| 9             | 6             | 0                           | -5.583043 | -3.670766 | 4.158458  |
| 10            | 6             | 0                           | -1.843984 | -0.074022 | 1.895877  |
| 11            | 6             | 0                           | -5.364592 | 1.274183  | -1.045696 |
| 12            | 6             | 0                           | -4.141048 | 3.93699   | -1.153623 |
| 13            | 6             | 0                           | -1.493562 | 4.072209  | -2.198241 |
| 14            | 6             | 0                           | -0.851898 | 3.829836  | -4.646672 |
| 15            | 6             | 0                           | 1.86445   | 3.982779  | -5.486671 |
| 16            | 6             | 0                           | -2.734812 | 3.390875  | -6.739344 |
| 17            | 8             | 0                           | -8.019895 | 1.560524  | -1.272241 |
| 18            | 1             | 0                           | -4.128082 | -4.316014 | 0.272868  |
| 19            | 1             | 0                           | -6.870307 | -0.808762 | 6.945738  |
| 20            | 1             | 0                           | 10.946025 | -0.017143 | 4.44502   |
| 21            | 1             | 0                           | 10.764606 | -3.065999 | 5.773849  |
| 22            | 1             | 0                           | 12.056792 | -3.103764 | 0.901493  |
| 23            | 1             | 0                           | -6.575484 | -3.974145 | -3.44298  |
| 24            | 1             | 0                           | -9.025011 | -6.135616 | -2.740627 |
| 25            | 1             | 0                           | -9.895875 | -0.922507 | -3.241408 |
| 26            | 1             | 0                           | -3.701949 | -3.695693 | 5.031269  |
| 27            | 1             | 0                           | -6.543619 | -5.455748 | 4.607862  |
| 28            | 1             | 0                           | -1.247561 | -1.391295 | 3.382833  |
| 29            | 1             | 0                           | -0.7217   | -0.46248  | 0.190017  |
| 30            | 1             | 0                           | -1.400205 | 1.843291  | 2.550211  |
| 31            | 1             | 0                           | -4.734504 | 0.204495  | -2.717788 |
| 32            | 1             | 0                           | -5.42859  | 5.04457   | -2.353844 |

|    |   |   |           |          |           |
|----|---|---|-----------|----------|-----------|
| 33 | 1 | 0 | -4.232555 | 4.795625 | 0.740518  |
| 34 | 1 | 0 | 0.038101  | 4.388778 | -0.843559 |
| 35 | 1 | 0 | 2.138814  | 5.542794 | -6.847398 |
| 36 | 1 | 0 | 3.158256  | 4.281851 | -3.886836 |
| 37 | 1 | 0 | 2.442403  | 2.236015 | -6.474589 |
| 38 | 1 | 0 | -4.708833 | 3.472481 | -6.103369 |
| 39 | 1 | 0 | -2.486393 | 4.804423 | -8.254449 |
| 40 | 1 | 0 | -2.429274 | 1.525788 | -7.627197 |
| 41 | 1 | 0 | -8.638748 | 1.741237 | 0.447869  |

| 2a-8          |               | Standard Orientation (A.U.) |           |           |           |
|---------------|---------------|-----------------------------|-----------|-----------|-----------|
| Center number | Atomic number | Atomic Type                 | X         | Y         | Z         |
| 0             | 6             | 0                           | -9.226381 | -2.792575 | 0.522521  |
| 1             | 6             | 0                           | -6.38134  | -3.256333 | 0.596684  |
| 2             | 6             | 0                           | -4.724676 | -0.82459  | 0.876395  |
| 3             | 8             | 0                           | -5.223198 | -0.101227 | 3.466341  |
| 4             | 6             | 0                           | -6.282255 | -2.197647 | 4.848856  |
| 5             | 6             | 0                           | -9.133997 | -1.812572 | 5.15463   |
| 6             | 6             | 0                           | -10.46004 | -2.182427 | 2.658375  |
| 7             | 6             | 0                           | 10.558305 | -2.989121 | -1.986996 |
| 8             | 8             | 0                           | -9.693164 | -1.165521 | -3.732191 |
| 9             | 6             | 0                           | -5.815594 | -4.506168 | 3.166426  |
| 10            | 6             | 0                           | -1.917654 | -1.456648 | 0.51186   |
| 11            | 6             | 0                           | -5.411111 | 1.45983   | -0.813386 |
| 12            | 6             | 0                           | -3.579553 | 3.737152  | -0.580264 |
| 13            | 6             | 0                           | -1.273999 | 3.665552  | -2.255083 |
| 14            | 6             | 0                           | -1.264167 | 4.01667   | -4.772963 |
| 15            | 6             | 0                           | 1.148665  | 3.883179  | -6.279325 |
| 16            | 6             | 0                           | -3.609662 | 4.551104  | -6.298975 |
| 17            | 8             | 0                           | -7.912404 | 2.314756  | -0.33319  |
| 18            | 1             | 0                           | -5.780008 | -4.378985 | -1.044595 |
| 19            | 1             | 0                           | -5.330021 | -2.28937  | 6.696128  |
| 20            | 1             | 0                           | -9.48587  | 0.107822  | 5.898629  |
| 21            | 1             | 0                           | -9.886717 | -3.12754  | 6.596264  |
| 22            | 1             | 0                           | 12.506728 | -1.875057 | 2.597792  |
| 23            | 1             | 0                           | -10.19066 | -4.859744 | -2.84151  |
| 24            | 1             | 0                           | 12.627319 | -2.856642 | -1.677839 |
| 25            | 1             | 0                           | -9.574777 | 0.413353  | -2.7858   |
| 26            | 1             | 0                           | -3.868812 | -5.200588 | 3.323528  |

|    |   |   |           |           |           |
|----|---|---|-----------|-----------|-----------|
| 27 | 1 | 0 | -7.107416 | -6.075447 | 3.589697  |
| 28 | 1 | 0 | -0.741524 | 0.015626  | 1.377268  |
| 29 | 1 | 0 | -1.405477 | -3.260127 | 1.396969  |
| 30 | 1 | 0 | -1.44827  | -1.564966 | -1.510061 |
| 31 | 1 | 0 | -5.410727 | 0.787256  | -2.780337 |
| 32 | 1 | 0 | -4.745716 | 5.391236  | -1.060804 |
| 33 | 1 | 0 | -3.036753 | 3.968096  | 1.415465  |
| 34 | 1 | 0 | 0.542657  | 3.283137  | -1.340996 |
| 35 | 1 | 0 | 1.027374  | 2.411977  | -7.756523 |
| 36 | 1 | 0 | 1.507966  | 5.683622  | -7.274402 |
| 37 | 1 | 0 | 2.794468  | 3.464033  | -5.079768 |
| 38 | 1 | 0 | -4.027192 | 2.964658  | -7.590577 |
| 39 | 1 | 0 | -5.295473 | 4.868194  | -5.130706 |
| 40 | 1 | 0 | -3.331818 | 6.231797  | -7.504267 |
| 41 | 1 | 0 | -8.17234  | 2.157502  | 1.475493  |

| 2a-9          |               | Standard Orientation (A.U.) |           |           |           |
|---------------|---------------|-----------------------------|-----------|-----------|-----------|
| Center number | Atomic number | Atomic Type                 | X         | Y         | Z         |
| 0             | 6             | 0                           | -8.42391  | -3.719656 | 0.666075  |
| 1             | 6             | 0                           | -5.657785 | -3.156932 | 1.192105  |
| 2             | 6             | 0                           | -4.947097 | -0.356509 | 0.569123  |
| 3             | 8             | 0                           | -6.127196 | 0.990135  | 2.640202  |
| 4             | 6             | 0                           | -6.758976 | -0.73474  | 4.665358  |
| 5             | 6             | 0                           | -9.585318 | -1.349915 | 4.590566  |
| 6             | 6             | 0                           | 10.199166 | -2.935952 | 2.302175  |
| 7             | 6             | 0                           | -9.129745 | -4.893448 | -1.854387 |
| 8             | 8             | 0                           | 11.149939 | -3.649306 | -3.044257 |
| 9             | 6             | 0                           | -5.271376 | -3.140788 | 4.069363  |
| 10            | 6             | 0                           | -2.076765 | 0.007213  | 0.625767  |
| 11            | 6             | 0                           | -6.064689 | 0.751186  | -1.919686 |
| 12            | 6             | 0                           | -4.981953 | 3.352266  | -2.701897 |
| 13            | 6             | 0                           | -2.60512  | 3.271095  | -4.249358 |
| 14            | 6             | 0                           | -0.479919 | 4.633073  | -3.965902 |
| 15            | 6             | 0                           | 1.70796   | 4.329356  | -5.763921 |
| 16            | 6             | 0                           | -0.051095 | 6.52722   | -1.884233 |
| 17            | 8             | 0                           | -8.732757 | 0.962402  | -1.753854 |
| 18            | 1             | 0                           | -4.413382 | -4.486164 | 0.187409  |
| 19            | 1             | 0                           | -6.223998 | 0.178103  | 6.455595  |
| 20            | 1             | 0                           | 10.669657 | 0.43635   | 4.541778  |

|    |   |   |           |           |           |
|----|---|---|-----------|-----------|-----------|
| 21 | 1 | 0 | -10.15561 | -2.304269 | 6.362145  |
| 22 | 1 | 0 | 12.190083 | -3.279906 | 1.859347  |
| 23 | 1 | 0 | -7.413699 | -4.940285 | -3.066382 |
| 24 | 1 | 0 | -9.695365 | -6.887697 | -1.594514 |
| 25 | 1 | 0 | -10.74165 | -1.854928 | -2.924517 |
| 26 | 1 | 0 | -3.277987 | -2.98519  | 4.619911  |
| 27 | 1 | 0 | -6.078568 | -4.820758 | 4.984252  |
| 28 | 1 | 0 | -1.215983 | -0.984167 | 2.231466  |
| 29 | 1 | 0 | -1.207092 | -0.706843 | -1.121438 |
| 30 | 1 | 0 | -1.602081 | 2.016294  | 0.800419  |
| 31 | 1 | 0 | -5.669165 | -0.61066  | -3.44932  |
| 32 | 1 | 0 | -6.493417 | 4.19682   | -3.86539  |
| 33 | 1 | 0 | -4.800152 | 4.558636  | -1.01881  |
| 34 | 1 | 0 | -2.673872 | 1.951656  | -5.85067  |
| 35 | 1 | 0 | 2.169918  | 6.140005  | -6.695674 |
| 36 | 1 | 0 | 3.433732  | 3.739208  | -4.745992 |
| 37 | 1 | 0 | 1.314423  | 2.922875  | -7.243817 |
| 38 | 1 | 0 | 1.624847  | 6.005593  | -0.753169 |
| 39 | 1 | 0 | 0.345055  | 8.415953  | -2.67932  |
| 40 | 1 | 0 | -1.666263 | 6.710114  | -0.594909 |
| 41 | 1 | 0 | -9.071637 | 1.433798  | -0.010826 |

**Table S3.** Gibbs free energies<sup>a</sup> and equilibrium populations<sup>b</sup> of low-energy conformers of **2b**.

| Conformers | $\Delta G(\text{a.u.})$ | P(%) / 100 | G(a.u.)     |
|------------|-------------------------|------------|-------------|
| 2b-1       | 0.00297                 | 1.58       | -811.351    |
| 2b-2       | 0.00134                 | 8.89       | -811.352633 |
| 2b-3       | 0.00215                 | 3.76       | -811.35182  |
| 2b-4       | 0.00041                 | 23.73      | -811.35356  |
| 2b-5       | 0.00321                 | 1.22       | -811.350758 |
| 2b-6       | 0.0                     | 36.72      | -811.353972 |
| 2b-7       | 0.00439                 | 0.35       | -811.349583 |
| 2b-8       | 0.00583                 | 0.08       | -811.348138 |
| 2b-9       | 0.00041                 | 23.68      | -811.353558 |

<sup>a</sup>wB97M-V/def2-TZVP, in a.u.

<sup>b</sup>From  $\Delta G$  values at 298.15K.

**Table S4.** Cartesian coordinates for the low-energy reoptimized random research conformers of **2b** at B3LYP-D3(BJ)/6-31G\* level of theory in methanol.

| 2b-1          |               | Standard Orientation (A.U.) |           |           |           |
|---------------|---------------|-----------------------------|-----------|-----------|-----------|
| Center number | Atomic number | Atomic Type                 | X         | Y         | Z         |
| 0             | 6             | 0                           | -6.14889  | -4.16875  | -1.093238 |
| 1             | 6             | 0                           | -7.832317 | -3.103384 | 0.988068  |
| 2             | 6             | 0                           | -6.968482 | -0.441926 | 1.95706   |
| 3             | 8             | 0                           | -7.924583 | 1.252877  | 0.05872   |
| 4             | 6             | 0                           | -9.47709  | -0.07534  | -1.709909 |
| 5             | 6             | 0                           | -7.90221  | -0.881048 | -4.009971 |
| 6             | 6             | 0                           | -6.228104 | -3.101855 | -3.396521 |
| 7             | 6             | 0                           | -4.444153 | -6.375193 | -0.489134 |
| 8             | 8             | 0                           | -2.310106 | -5.733347 | 0.981693  |
| 9             | 6             | 0                           | 10.377008 | -2.391599 | -0.233966 |
| 10            | 6             | 0                           | -8.178199 | 0.204955  | 4.504189  |
| 11            | 6             | 0                           | -4.073642 | -0.124362 | 2.065643  |
| 12            | 6             | 0                           | -3.130661 | 2.61013   | 2.340293  |
| 13            | 6             | 0                           | -3.429041 | 4.164153  | -0.027922 |
| 14            | 6             | 0                           | -1.966118 | 4.010232  | -2.097839 |
| 15            | 6             | 0                           | -2.530762 | 5.563109  | -4.416677 |
| 16            | 8             | 0                           | -3.234793 | -1.660083 | 4.13856   |
| 17            | 6             | 0                           | 0.257546  | 2.246806  | -2.343233 |
| 18            | 1             | 0                           | -8.008794 | -4.446891 | 2.562504  |
| 19            | 1             | 0                           | 11.009654 | 1.209694  | -2.282495 |
| 20            | 1             | 0                           | -6.755474 | 0.752499  | -4.6213   |
| 21            | 1             | 0                           | -9.156523 | -1.352175 | -5.61593  |
| 22            | 1             | 0                           | -5.048186 | -3.866326 | -4.917165 |
| 23            | 1             | 0                           | -5.589181 | -7.864736 | 0.454356  |
| 24            | 1             | 0                           | -3.726625 | -7.198429 | -2.262099 |
| 25            | 1             | 0                           | -2.855179 | -4.722223 | 2.422189  |
| 26            | 1             | 0                           | 11.812957 | -1.870136 | 1.172793  |
| 27            | 1             | 0                           | -11.13605 | -3.901121 | -1.441353 |
| 28            | 1             | 0                           | 10.223311 | -0.15125  | 4.46204   |
| 29            | 1             | 0                           | -7.321932 | -0.915284 | 6.026539  |
| 30            | 1             | 0                           | -7.906919 | 2.221539  | 4.927872  |
| 31            | 1             | 0                           | -3.278332 | -0.8843   | 0.300642  |
| 32            | 1             | 0                           | -4.072076 | 3.531803  | 3.949574  |
| 33            | 1             | 0                           | -1.106979 | 2.483483  | 2.848375  |
| 34            | 1             | 0                           | -5.056065 | 5.435024  | -0.082334 |



|    |   |   |           |           |           |
|----|---|---|-----------|-----------|-----------|
| 35 | 1 | 0 | -2.88736  | 4.329925  | -6.065499 |
| 36 | 1 | 0 | -4.197001 | 6.777009  | -4.148506 |
| 37 | 1 | 0 | -0.910482 | 6.775671  | -4.931909 |
| 38 | 1 | 0 | -1.457166 | -1.326997 | 4.404262  |
| 39 | 1 | 0 | -0.188191 | 0.678005  | -3.647626 |
| 40 | 1 | 0 | 1.908271  | 3.236637  | -3.147826 |
| 41 | 1 | 0 | 0.836284  | 1.400113  | -0.537581 |

| 2b-2          |               | Standard Orientation (A.U.) |           |           |           |
|---------------|---------------|-----------------------------|-----------|-----------|-----------|
| Center number | Atomic number | Atomic Type                 | X         | Y         | Z         |
| 0             | 6             | 0                           | -7.071529 | -4.078423 | -0.69176  |
| 1             | 6             | 0                           | -7.759884 | -2.911406 | 1.838681  |
| 2             | 6             | 0                           | -6.617875 | -0.201965 | 2.213402  |
| 3             | 8             | 0                           | -8.378792 | 1.424368  | 0.903905  |
| 4             | 6             | 0                           | 10.458289 | -0.020723 | -0.042236 |
| 5             | 6             | 0                           | -9.92538  | -0.923711 | -2.751735 |
| 6             | 6             | 0                           | -8.073544 | -3.092326 | -2.804915 |
| 7             | 6             | 0                           | -5.361877 | -6.374349 | -0.693558 |
| 8             | 8             | 0                           | -3.627187 | -6.445262 | 1.310379  |
| 9             | 6             | 0                           | -10.59547 | -2.265143 | 1.769587  |
| 10            | 6             | 0                           | -6.52362  | 0.500055  | 5.013419  |
| 11            | 6             | 0                           | -4.055109 | 0.237067  | 0.911158  |
| 12            | 6             | 0                           | -3.124167 | 2.980579  | 1.058671  |
| 13            | 6             | 0                           | -0.712391 | 3.369832  | -0.416452 |
| 14            | 6             | 0                           | -0.519815 | 3.511898  | -2.950135 |
| 15            | 6             | 0                           | 1.99991   | 3.837289  | -4.233694 |
| 16            | 8             | 0                           | -2.236091 | -1.447068 | 1.990555  |
| 17            | 6             | 0                           | -2.762617 | 3.380497  | -4.702209 |
| 18            | 1             | 0                           | -7.195909 | -4.166911 | 3.38762   |
| 19            | 1             | 0                           | 12.135448 | 1.209711  | 0.000594  |
| 20            | 1             | 0                           | -9.205649 | 0.698461  | -3.852679 |
| 21            | 1             | 0                           | 11.713368 | -1.495171 | -3.675526 |
| 22            | 1             | 0                           | -7.598814 | -3.906836 | -4.65031  |
| 23            | 1             | 0                           | -6.551612 | -8.084384 | -0.499832 |
| 24            | 1             | 0                           | -4.4334   | -6.525639 | -2.570947 |
| 25            | 1             | 0                           | -2.911283 | -4.756408 | 1.525215  |
| 26            | 1             | 0                           | 11.319987 | -1.674735 | 3.62573   |
| 27            | 1             | 0                           | 11.755334 | -3.837704 | 1.065131  |
| 28            | 1             | 0                           | -8.266047 | -0.073784 | 5.988289  |

|    |   |   |           |           |           |
|----|---|---|-----------|-----------|-----------|
| 29 | 1 | 0 | -4.907842 | -0.436308 | 5.926026  |
| 30 | 1 | 0 | -6.326704 | 2.555757  | 5.23714   |
| 31 | 1 | 0 | -4.322087 | -0.238454 | -1.09646  |
| 32 | 1 | 0 | -4.659239 | 4.190775  | 0.350864  |
| 33 | 1 | 0 | -2.806795 | 3.492941  | 3.048298  |
| 34 | 1 | 0 | 1.039737  | 3.515241  | 0.682186  |
| 35 | 1 | 0 | 3.569007  | 3.897006  | -2.871092 |
| 36 | 1 | 0 | 2.360344  | 2.28097   | -5.577989 |
| 37 | 1 | 0 | 2.041154  | 5.598978  | -5.353359 |
| 38 | 1 | 0 | -0.610303 | -1.013572 | 1.268133  |
| 39 | 1 | 0 | -4.580919 | 3.376739  | -3.702661 |
| 40 | 1 | 0 | -2.746754 | 4.993144  | -6.02585  |
| 41 | 1 | 0 | -2.676321 | 1.656418  | -5.876091 |

| 2b-3          |               | Standard Orientation (A.U.) |           |           |           |
|---------------|---------------|-----------------------------|-----------|-----------|-----------|
| Center number | Atomic number | Atomic Type                 | X         | Y         | Z         |
| 0             | 6             | 0                           | -6.647948 | -4.601236 | -0.60097  |
| 1             | 6             | 0                           | -8.199065 | -2.892637 | 1.104936  |
| 2             | 6             | 0                           | -6.931234 | -0.248366 | 1.568968  |
| 3             | 8             | 0                           | -7.662715 | 1.206625  | -0.612475 |
| 4             | 6             | 0                           | -9.267884 | -0.255314 | -2.2205   |
| 5             | 6             | 0                           | -7.692916 | -1.704415 | -4.185625 |
| 6             | 6             | 0                           | -6.405791 | -3.982205 | -3.050268 |
| 7             | 6             | 0                           | -5.553927 | -6.997327 | 0.52285   |
| 8             | 8             | 0                           | -4.991906 | -6.83341  | 3.109922  |
| 9             | 6             | 0                           | 10.558433 | -2.073392 | -0.386725 |
| 10            | 6             | 0                           | -7.986695 | 0.99118   | 3.955671  |
| 11            | 6             | 0                           | -4.012294 | -0.301894 | 1.605969  |
| 12            | 6             | 0                           | -2.712765 | 2.283228  | 1.896861  |
| 13            | 6             | 0                           | -3.052068 | 4.046802  | -0.303723 |
| 14            | 6             | 0                           | -1.454876 | 4.381     | -2.250626 |
| 15            | 6             | 0                           | -2.083708 | 6.1941    | -4.355832 |
| 16            | 8             | 0                           | -3.288898 | -1.916338 | 3.658292  |
| 17            | 6             | 0                           | 1.025543  | 3.017304  | -2.566456 |
| 18            | 1             | 0                           | -8.599946 | -3.841978 | 2.902424  |
| 19            | 1             | 0                           | 10.567292 | 1.070083  | -3.159657 |
| 20            | 1             | 0                           | -6.295477 | -0.380542 | -4.994522 |
| 21            | 1             | 0                           | -8.913263 | -2.302393 | -5.77595  |
| 22            | 1             | 0                           | -5.295857 | -5.190421 | -4.316384 |

|    |   |   |           |           |           |
|----|---|---|-----------|-----------|-----------|
| 23 | 1 | 0 | -6.968685 | -8.525803 | 0.326941  |
| 24 | 1 | 0 | -3.899461 | -7.59028  | -0.626238 |
| 25 | 1 | 0 | -4.18528  | -5.203296 | 3.419105  |
| 26 | 1 | 0 | -11.93533 | -1.065303 | 0.799189  |
| 27 | 1 | 0 | 11.508962 | -3.670406 | -1.314297 |
| 28 | 1 | 0 | -7.134968 | 0.135153  | 5.646522  |
| 29 | 1 | 0 | -7.583915 | 3.029522  | 3.953011  |
| 30 | 1 | 0 | 10.048807 | 0.761822  | 4.058248  |
| 31 | 1 | 0 | -3.386277 | -1.131319 | -0.198512 |
| 32 | 1 | 0 | -3.37951  | 3.182297  | 3.652725  |
| 33 | 1 | 0 | -0.683171 | 1.889628  | 2.182767  |
| 34 | 1 | 0 | -4.832741 | 5.09242   | -0.335323 |
| 35 | 1 | 0 | -0.618829 | 7.671123  | -4.541711 |
| 36 | 1 | 0 | -2.157209 | 5.206136  | -6.194515 |
| 37 | 1 | 0 | -3.915459 | 7.128211  | -4.051538 |
| 38 | 1 | 0 | -1.496402 | -1.717234 | 3.948698  |
| 39 | 1 | 0 | 2.596928  | 4.375667  | -2.774146 |
| 40 | 1 | 0 | 1.48286   | 1.747818  | -0.988566 |
| 41 | 1 | 0 | 1.009617  | 1.871048  | -4.311255 |

| 2b-4          |               | Standard Orientation (A.U.) |           |           |           |
|---------------|---------------|-----------------------------|-----------|-----------|-----------|
| Center number | Atomic number | Atomic Type                 | X         | Y         | Z         |
| 0             | 6             | 0                           | -6.250223 | -4.066192 | 0.50482   |
| 1             | 6             | 0                           | -7.822038 | -2.42378  | 2.25791   |
| 2             | 6             | 0                           | -7.365886 | 0.459695  | 1.802143  |
| 3             | 8             | 0                           | -8.850961 | 0.970381  | -0.429807 |
| 4             | 6             | 0                           | 10.387666 | -1.170695 | -1.058231 |
| 5             | 6             | 0                           | -9.066341 | -2.797767 | -3.063282 |
| 6             | 6             | 0                           | -6.87045  | -4.232362 | -1.949901 |
| 7             | 6             | 0                           | -4.002151 | -5.400314 | 1.638952  |
| 8             | 8             | 0                           | -2.385423 | -6.559522 | -0.133201 |
| 9             | 6             | 0                           | 10.599324 | -2.635575 | 1.42511   |
| 10            | 6             | 0                           | -8.317679 | 2.053701  | 4.017837  |
| 11            | 6             | 0                           | -4.615364 | 1.124327  | 1.143619  |
| 12            | 6             | 0                           | -4.247621 | 3.86665   | 0.261893  |
| 13            | 6             | 0                           | -1.590721 | 4.330451  | -0.666496 |
| 14            | 6             | 0                           | -0.639342 | 3.567316  | -2.900032 |
| 15            | 6             | 0                           | 2.069278  | 4.073818  | -3.615408 |
| 16            | 8             | 0                           | -3.107951 | 0.565523  | 3.298474  |

|    |   |   |           |           |           |
|----|---|---|-----------|-----------|-----------|
| 17 | 6 | 0 | -2.169672 | 2.182756  | -4.86572  |
| 18 | 1 | 0 | -7.494862 | -2.925162 | 4.247065  |
| 19 | 1 | 0 | 12.204416 | -0.449649 | -1.771782 |
| 20 | 1 | 0 | -8.4224   | -1.547288 | -4.606919 |
| 21 | 1 | 0 | -10.43514 | -4.122113 | -3.92843  |
| 22 | 1 | 0 | -5.756216 | -5.455133 | -3.190662 |
| 23 | 1 | 0 | -2.989509 | -4.026088 | 2.851141  |
| 24 | 1 | 0 | -4.672214 | -6.919316 | 2.907436  |
| 25 | 1 | 0 | -1.750258 | -5.242698 | -1.22928  |
| 26 | 1 | 0 | 11.894416 | -1.694471 | 2.747855  |
| 27 | 1 | 0 | 11.213163 | -4.60307  | 1.168194  |
| 28 | 1 | 0 | -8.521285 | 4.036792  | 3.432651  |
| 29 | 1 | 0 | 10.175313 | 1.403446  | 4.681963  |
| 30 | 1 | 0 | -6.965371 | 1.953255  | 5.591309  |
| 31 | 1 | 0 | -4.072802 | -0.111005 | -0.445012 |
| 32 | 1 | 0 | -5.652697 | 4.23837   | -1.224742 |
| 33 | 1 | 0 | -4.669219 | 5.152154  | 1.840955  |
| 34 | 1 | 0 | -0.31557  | 5.342868  | 0.616673  |
| 35 | 1 | 0 | 2.177205  | 5.236343  | -5.346543 |
| 36 | 1 | 0 | 3.104654  | 5.059642  | -2.105754 |
| 37 | 1 | 0 | 3.07647   | 2.295497  | -4.04411  |
| 38 | 1 | 0 | -1.388689 | 1.032931  | 2.890416  |
| 39 | 1 | 0 | -2.053162 | 3.16318   | -6.70428  |
| 40 | 1 | 0 | -1.401004 | 0.266786  | -5.180227 |
| 41 | 1 | 0 | -4.17198  | 1.986627  | -4.358171 |

| 2b-5          |               | Standard Orientation (A.U.) |           |           |           |
|---------------|---------------|-----------------------------|-----------|-----------|-----------|
| Center number | Atomic number | Atomic Type                 | X         | Y         | Z         |
| 0             | 6             | 0                           | -5.910396 | -4.092365 | 0.243289  |
| 1             | 6             | 0                           | -8.083142 | -2.570999 | 1.362991  |
| 2             | 6             | 0                           | -7.567772 | 0.343363  | 1.394024  |
| 3             | 8             | 0                           | -8.161755 | 1.121856  | -1.140148 |
| 4             | 6             | 0                           | -9.174779 | -0.949858 | -2.552447 |
| 5             | 6             | 0                           | -7.055333 | -2.314832 | -3.991979 |
| 6             | 6             | 0                           | -5.495276 | -3.948736 | -2.258232 |
| 7             | 6             | 0                           | -4.238913 | -5.651536 | 1.966385  |
| 8             | 8             | 0                           | -2.235624 | -4.296145 | 3.090125  |
| 9             | 6             | 0                           | 10.296162 | -2.676913 | -0.52492  |
| 10            | 6             | 0                           | -9.350517 | 1.716251  | 3.217824  |

|    |   |   |           |           |           |
|----|---|---|-----------|-----------|-----------|
| 11 | 6 | 0 | -4.776424 | 1.005936  | 1.935028  |
| 12 | 6 | 0 | -3.985846 | 3.740134  | 1.357643  |
| 13 | 6 | 0 | -3.81295  | 4.306784  | -1.429376 |
| 14 | 6 | 0 | -1.952496 | 3.537295  | -2.976675 |
| 15 | 6 | 0 | -2.039544 | 4.088013  | -5.7685   |
| 16 | 8 | 0 | -4.158947 | 0.309556  | 4.474363  |
| 17 | 6 | 0 | 0.290994  | 2.004114  | -2.121166 |
| 18 | 1 | 0 | -8.567222 | -3.26641  | 3.259132  |
| 19 | 1 | 0 | 10.578495 | -0.17145  | -3.875578 |
| 20 | 1 | 0 | -5.853953 | -0.869388 | -4.900197 |
| 21 | 1 | 0 | -7.857515 | -3.469299 | -5.540118 |
| 22 | 1 | 0 | -3.956538 | -5.048747 | -3.101692 |
| 23 | 1 | 0 | -5.443155 | -6.580197 | 3.415899  |
| 24 | 1 | 0 | -3.360004 | -7.173922 | 0.849965  |
| 25 | 1 | 0 | -2.918746 | -2.901419 | 4.077976  |
| 26 | 1 | 0 | 12.046264 | -1.875322 | 0.257002  |
| 27 | 1 | 0 | 10.683152 | -4.603101 | -1.197394 |
| 28 | 1 | 0 | -9.209088 | 3.773777  | 2.957373  |
| 29 | 1 | 0 | -11.32411 | 1.181028  | 2.859979  |
| 30 | 1 | 0 | -8.92438  | 1.251633  | 5.201151  |
| 31 | 1 | 0 | -3.592491 | -0.234134 | 0.774904  |
| 32 | 1 | 0 | -5.283039 | 5.083176  | 2.284062  |
| 33 | 1 | 0 | -2.129745 | 3.987898  | 2.270979  |
| 34 | 1 | 0 | -5.406135 | 5.327529  | -2.258626 |
| 35 | 1 | 0 | -2.05366  | 2.314171  | -6.87317  |
| 36 | 1 | 0 | -3.725924 | 5.185904  | -6.291477 |
| 37 | 1 | 0 | -0.34907  | 5.146812  | -6.386552 |
| 38 | 1 | 0 | -4.96325  | 1.45832   | 5.642563  |
| 39 | 1 | 0 | 2.066498  | 2.804314  | -2.869724 |
| 40 | 1 | 0 | 0.46483   | 1.873621  | -0.056745 |
| 41 | 1 | 0 | 0.166225  | 0.052172  | -2.853353 |

| 2b-6          |               | Standard Orientation (A.U.) |           |           |           |
|---------------|---------------|-----------------------------|-----------|-----------|-----------|
| Center number | Atomic number | Atomic Type                 | X         | Y         | Z         |
| 0             | 6             | 0                           | -7.19793  | -4.337134 | -0.039658 |
| 1             | 6             | 0                           | -8.272085 | -2.266398 | 1.630669  |
| 2             | 6             | 0                           | -7.489228 | 0.436148  | 0.725273  |
| 3             | 8             | 0                           | -9.203913 | 0.92881   | -1.335067 |
| 4             | 6             | 0                           | 11.067237 | -1.026878 | -1.500483 |

|    |   |   |           |           |           |
|----|---|---|-----------|-----------|-----------|
| 5  | 6 | 0 | 10.240431 | -3.048895 | -3.411538 |
| 6  | 6 | 0 | -8.139386 | -4.669805 | -2.372041 |
| 7  | 6 | 0 | -5.047837 | -5.883527 | 1.010289  |
| 8  | 8 | 0 | -4.245464 | -7.887277 | -0.54355  |
| 9  | 6 | 0 | 11.140264 | -2.144757 | 1.163968  |
| 10 | 6 | 0 | -7.872961 | 2.394245  | 2.817994  |
| 11 | 6 | 0 | -4.792385 | 0.57222   | -0.356501 |
| 12 | 6 | 0 | -4.120979 | 3.151893  | -1.520792 |
| 13 | 6 | 0 | -1.486641 | 3.122293  | -2.58305  |
| 14 | 6 | 0 | 0.64171   | 3.930419  | -1.439277 |
| 15 | 6 | 0 | 3.174882  | 3.723294  | -2.727003 |
| 16 | 8 | 0 | -3.102655 | -0.058384 | 1.632721  |
| 17 | 6 | 0 | 0.71467   | 5.146834  | 1.138695  |
| 18 | 1 | 0 | -7.750562 | -2.560496 | 3.618947  |
| 19 | 1 | 0 | 12.853781 | -0.140186 | -2.093577 |
| 20 | 1 | 0 | -9.622309 | -2.085054 | -5.157038 |
| 21 | 1 | 0 | 11.876456 | -4.234385 | -3.955153 |
| 22 | 1 | 0 | -7.330396 | -6.130947 | -3.591319 |
| 23 | 1 | 0 | -3.414273 | -4.621506 | 1.292625  |
| 24 | 1 | 0 | -5.582354 | -6.550194 | 2.931     |
| 25 | 1 | 0 | -5.668042 | -9.010993 | -0.772059 |
| 26 | 1 | 0 | 12.102712 | -0.866454 | 2.488327  |
| 27 | 1 | 0 | 12.049382 | -4.010417 | 1.251384  |
| 28 | 1 | 0 | -6.31221  | 2.284492  | 4.184666  |
| 29 | 1 | 0 | -7.930342 | 4.304977  | 2.004942  |
| 30 | 1 | 0 | -9.66643  | 2.089163  | 3.82078   |
| 31 | 1 | 0 | -4.680769 | -0.853014 | -1.87764  |
| 32 | 1 | 0 | -5.509216 | 3.541869  | -3.01941  |
| 33 | 1 | 0 | -4.325609 | 4.636459  | -0.082895 |
| 34 | 1 | 0 | -1.284843 | 2.25511   | -4.456093 |
| 35 | 1 | 0 | 4.510839  | 2.60218   | -1.579725 |
| 36 | 1 | 0 | 3.029003  | 2.840974  | -4.603636 |
| 37 | 1 | 0 | 4.04348   | 5.607883  | -2.95956  |
| 38 | 1 | 0 | -1.409787 | 0.227478  | 0.994847  |
| 39 | 1 | 0 | -1.121571 | 5.139132  | 2.100382  |
| 40 | 1 | 0 | 2.080319  | 4.16307   | 2.372427  |
| 41 | 1 | 0 | 1.378826  | 7.121039  | 0.995044  |

| 2b-7   |        | Standard Orientation (A.U.) |   |   |   |
|--------|--------|-----------------------------|---|---|---|
| Center | Atomic | Atomic                      | X | Y | Z |

| number | number | Type |           |           |           |
|--------|--------|------|-----------|-----------|-----------|
| 0      | 6      | 0    | -8.106402 | -4.200343 | -0.271989 |
| 1      | 6      | 0    | -7.453496 | -2.714502 | 2.107587  |
| 2      | 6      | 0    | -6.470579 | 0.019224  | 1.558272  |
| 3      | 8      | 0    | -8.751759 | 1.410284  | 1.030454  |
| 4      | 6      | 0    | 10.929636 | -0.099987 | 1.594214  |
| 5      | 6      | 0    | 11.890453 | -1.403639 | -0.811553 |
| 6      | 6      | 0    | 10.198104 | -3.565759 | -1.566134 |
| 7      | 6      | 0    | -6.367101 | -6.288817 | -1.186192 |
| 8      | 8      | 0    | -4.489276 | -5.48968  | -2.901894 |
| 9      | 6      | 0    | -9.948617 | -2.074547 | 3.463439  |
| 10     | 6      | 0    | -5.165974 | 1.153065  | 3.878558  |
| 11     | 6      | 0    | -4.795496 | 0.170303  | -0.82097  |
| 12     | 6      | 0    | -4.099067 | 2.879527  | -1.679336 |
| 13     | 6      | 0    | -1.807187 | 3.974419  | -0.394637 |
| 14     | 6      | 0    | 0.618242  | 3.712347  | -1.137846 |
| 15     | 6      | 0    | 2.740881  | 4.915152  | 0.334126  |
| 16     | 8      | 0    | -2.602884 | -1.356906 | -0.490308 |
| 17     | 6      | 0    | 1.437483  | 2.302153  | -3.476147 |
| 18     | 1      | 0    | -6.104801 | -3.765457 | 3.286121  |
| 19     | 1      | 0    | -12.38312 | 1.163655  | 2.381593  |
| 20     | 1      | 0    | 11.980995 | 0.017055  | -2.338858 |
| 21     | 1      | 0    | 13.849968 | -2.080913 | -0.533313 |
| 22     | 1      | 0    | 10.709647 | -4.637969 | -3.262669 |
| 23     | 1      | 0    | -5.527649 | -7.251709 | 0.479818  |
| 24     | 1      | 0    | -7.50853  | -7.711589 | -2.192408 |
| 25     | 1      | 0    | -3.383948 | -4.293131 | -2.043646 |
| 26     | 1      | 0    | -9.643057 | -1.246084 | 5.343127  |
| 27     | 1      | 0    | 11.200667 | -3.720267 | 3.653756  |
| 28     | 1      | 0    | -3.239923 | 0.400984  | 4.091815  |
| 29     | 1      | 0    | -5.06826  | 3.218667  | 3.700834  |
| 30     | 1      | 0    | -6.217436 | 0.729731  | 5.618886  |
| 31     | 1      | 0    | -5.875648 | -0.711686 | -2.355412 |
| 32     | 1      | 0    | -3.792896 | 2.819652  | -3.734786 |
| 33     | 1      | 0    | -5.766476 | 4.075334  | -1.352866 |
| 34     | 1      | 0    | -2.142212 | 5.063029  | 1.33266   |
| 35     | 1      | 0    | 3.785541  | 6.275534  | -0.855991 |
| 36     | 1      | 0    | 2.051923  | 5.919975  | 2.018322  |
| 37     | 1      | 0    | 4.13277   | 3.485597  | 0.946508  |
| 38     | 1      | 0    | -1.246536 | -0.283436 | 0.120916  |
| 39     | 1      | 0    | 2.397062  | 3.599968  | -4.799911 |

|    |   |   |           |          |           |
|----|---|---|-----------|----------|-----------|
| 40 | 1 | 0 | 2.833032  | 0.828352 | -2.992667 |
| 41 | 1 | 0 | -0.127138 | 1.379812 | -4.474348 |

| 2b-8          |               | Standard Orientation (A.U.) |           |           |           |
|---------------|---------------|-----------------------------|-----------|-----------|-----------|
| Center number | Atomic number | Atomic Type                 | X         | Y         | Z         |
| 0             | 6             | 0                           | -7.464709 | -3.649798 | -1.399568 |
| 1             | 6             | 0                           | -7.695367 | -3.197858 | 1.439567  |
| 2             | 6             | 0                           | -6.696385 | -0.547531 | 2.291826  |
| 3             | 8             | 0                           | -8.716036 | 1.133459  | 1.573781  |
| 4             | 6             | 0                           | 10.903693 | -0.279025 | 0.831236  |
| 5             | 6             | 0                           | 10.974895 | -0.539781 | -2.055474 |
| 6             | 6             | 0                           | -9.029381 | -2.407317 | -2.968655 |
| 7             | 6             | 0                           | -5.465467 | -5.437549 | -2.39107  |
| 8             | 8             | 0                           | -3.024185 | -4.365497 | -2.581677 |
| 9             | 6             | 0                           | 10.522257 | -2.872368 | 2.050517  |
| 10            | 6             | 0                           | -6.274194 | -0.427177 | 5.149643  |
| 11            | 6             | 0                           | -4.335172 | 0.300324  | 0.836295  |
| 12            | 6             | 0                           | -3.607159 | 3.086875  | 1.17208   |
| 13            | 6             | 0                           | -1.041181 | 3.666181  | 0.045342  |
| 14            | 6             | 0                           | -0.323119 | 3.299132  | -2.372192 |
| 15            | 6             | 0                           | 2.339384  | 3.855517  | -3.212986 |
| 16            | 8             | 0                           | -2.307654 | -1.341094 | 1.566395  |
| 17            | 6             | 0                           | -2.064835 | 2.302612  | -4.404168 |
| 18            | 1             | 0                           | -6.777482 | -4.722686 | 2.510337  |
| 19            | 1             | 0                           | -12.57954 | 0.741484  | 1.523709  |
| 20            | 1             | 0                           | 10.629744 | 1.339905  | -2.895982 |
| 21            | 1             | 0                           | 12.884353 | -1.115013 | -2.686814 |
| 22            | 1             | 0                           | -8.904082 | -2.744085 | -5.00834  |
| 23            | 1             | 0                           | -5.432911 | -7.15581  | -1.184663 |
| 24            | 1             | 0                           | -5.993907 | -6.052593 | -4.30855  |
| 25            | 1             | 0                           | -2.56378  | -3.663406 | -0.935339 |
| 26            | 1             | 0                           | 10.887876 | -2.807365 | 4.093306  |
| 27            | 1             | 0                           | 11.702735 | -4.358572 | 1.207631  |
| 28            | 1             | 0                           | -4.526296 | -1.427237 | 5.656316  |
| 29            | 1             | 0                           | -6.113935 | 1.552628  | 5.75974   |
| 30            | 1             | 0                           | -7.862037 | -1.271365 | 6.187674  |
| 31            | 1             | 0                           | -4.74783  | -0.005391 | -1.172204 |
| 32            | 1             | 0                           | -5.117725 | 4.224775  | 0.297888  |
| 33            | 1             | 0                           | -3.583584 | 3.583173  | 3.190195  |



|    |   |   |           |           |           |
|----|---|---|-----------|-----------|-----------|
| 34 | 1 | 0 | 0.382436  | 4.413166  | 1.351591  |
| 35 | 1 | 0 | 3.212619  | 2.164882  | -4.071715 |
| 36 | 1 | 0 | 2.353031  | 5.332349  | -4.688395 |
| 37 | 1 | 0 | 3.545413  | 4.488665  | -1.642258 |
| 38 | 1 | 0 | -0.756461 | -0.490627 | 1.071509  |
| 39 | 1 | 0 | -2.036012 | 0.215557  | -4.461875 |
| 40 | 1 | 0 | -4.038706 | 2.879055  | -4.097722 |
| 41 | 1 | 0 | -1.476991 | 2.985972  | -6.280307 |

| 2b-9          |               | Standard Orientation (A.U.) |           |           |           |
|---------------|---------------|-----------------------------|-----------|-----------|-----------|
| Center number | Atomic number | Atomic Type                 | X         | Y         | Z         |
| 0             | 6             | 0                           | -7.452302 | -4.522198 | 0.741281  |
| 1             | 6             | 0                           | -7.878734 | -2.055161 | 2.171093  |
| 2             | 6             | 0                           | -6.049653 | 0.140838  | 1.398219  |
| 3             | 8             | 0                           | -7.076371 | 0.964021  | -0.989762 |
| 4             | 6             | 0                           | -9.49127  | -0.148384 | -1.427459 |
| 5             | 6             | 0                           | -9.195521 | -2.468113 | -3.146355 |
| 6             | 6             | 0                           | -8.091907 | -4.663697 | -1.715342 |
| 7             | 6             | 0                           | -6.414702 | -6.788969 | 2.113097  |
| 8             | 8             | 0                           | -3.761891 | -6.631072 | 2.62284   |
| 9             | 6             | 0                           | 10.395467 | -0.9578   | 1.198922  |
| 10            | 6             | 0                           | -6.142946 | 2.304891  | 3.314745  |
| 11            | 6             | 0                           | -3.280717 | -0.714847 | 0.99398   |
| 12            | 6             | 0                           | -1.453477 | 1.377861  | 0.151595  |
| 13            | 6             | 0                           | -2.084335 | 2.650072  | -2.298153 |
| 14            | 6             | 0                           | -2.304909 | 5.13585   | -2.76081  |
| 15            | 6             | 0                           | -2.986404 | 6.08317   | -5.359448 |
| 16            | 8             | 0                           | -2.296653 | -1.701893 | 3.270816  |
| 17            | 6             | 0                           | -1.975661 | 7.183875  | -0.80982  |
| 18            | 1             | 0                           | -7.833454 | -2.373483 | 4.22208   |
| 19            | 1             | 0                           | -10.70667 | 1.280166  | -2.329808 |
| 20            | 1             | 0                           | -7.968681 | -1.945151 | -4.7516   |
| 21            | 1             | 0                           | 11.037006 | -3.01728  | -3.972019 |
| 22            | 1             | 0                           | -7.868838 | -6.45845  | -2.727859 |
| 23            | 1             | 0                           | -7.313681 | -6.978857 | 3.981631  |
| 24            | 1             | 0                           | -6.831719 | -8.526733 | 1.034002  |
| 25            | 1             | 0                           | -2.881736 | -6.673829 | 1.019374  |
| 26            | 1             | 0                           | 11.026212 | 0.675292  | 2.312899  |
| 27            | 1             | 0                           | 11.924286 | -2.363489 | 1.148067  |

|    |   |   |           |           |           |
|----|---|---|-----------|-----------|-----------|
| 28 | 1 | 0 | -8.082434 | 2.713318  | 3.936255  |
| 29 | 1 | 0 | -4.991206 | 1.819154  | 4.974345  |
| 30 | 1 | 0 | -5.388225 | 4.031956  | 2.445495  |
| 31 | 1 | 0 | -3.327361 | -2.169185 | -0.51008  |
| 32 | 1 | 0 | -1.252191 | 2.73739   | 1.708275  |
| 33 | 1 | 0 | 0.401938  | 0.430166  | -0.003573 |
| 34 | 1 | 0 | -2.412478 | 1.362488  | -3.888894 |
| 35 | 1 | 0 | -4.784256 | 7.146543  | -5.311523 |
| 36 | 1 | 0 | -1.541833 | 7.402398  | -6.091687 |
| 37 | 1 | 0 | -3.197298 | 4.526776  | -6.722107 |
| 38 | 1 | 0 | -2.826441 | -3.4607   | 3.424114  |
| 39 | 1 | 0 | -1.425062 | 6.462562  | 1.055984  |
| 40 | 1 | 0 | -0.522822 | 8.555469  | -1.415524 |
| 41 | 1 | 0 | -3.746805 | 8.267813  | -0.583848 |

**Table S5.** DP4+ analysis of compound **2**.

| <b>Default parameters</b> | <b>2a</b>     | <b>2b</b>     |
|---------------------------|---------------|---------------|
| <b>sDP4+ (H data)</b>     |               |               |
| <b>sDP4+ (C data)</b>     | <b>13.39%</b> | <b>86.61%</b> |
| <b>sDP4+ (all data)</b>   | <b>13.39%</b> | <b>86.61%</b> |
| <b>uDP4+ (H data)</b>     |               |               |
| <b>uDP4+ (C data)</b>     | <b>0.35%</b>  | <b>99.65%</b> |
| <b>uDP4+ (all data)</b>   | <b>0.35%</b>  | <b>99.65%</b> |
| <b>DP4+(H data)</b>       |               |               |
| <b>DP4+(C data)</b>       | <b>0.05%</b>  | <b>99.95%</b> |
| <b>DP4+(all data)</b>     | <b>0.05%</b>  | <b>99.95%</b> |

## ECD calculation of compound 2.

In general, conformational analyses were carried out via random searching in the Sybyl-X 2.0 using the MMFF94S force field with an energy cutoff of 5 kcal/mol.<sup>[1]</sup> The results showed five lowest energy conformer for both compounds. Subsequently, geometry optimizations and frequency analyses were implemented at the B3LYP-D3(BJ)/6-31G\* level in PCM methanol using ORCA5.0.1<sup>[2]</sup> All conformers used for property calculations in this work were characterized to be stable point on potential energy surface (PES) with no imaginary frequencies. The excitation energies, oscillator strengths, and rotational strengths (velocity) of the first 60 excited states were calculated using the TD-DFT methodology at the PBE0/def2-TZVP level in PCM methanol using ORCA5.0.1.<sup>[2]</sup> The ECD spectra were simulated by the overlapping Gaussian function (half the bandwidth at 1/e peak height,  $\sigma = 0.30$  for all).<sup>[3]</sup> Gibbs free energies for conformers were determined by using thermal correction at B3LYP-D3(BJ)/6-31G\* level and electronic energies evaluated at the wB97M-V/def2-TZVP level in PCM methanol using ORCA5.0.1<sup>[2]</sup> To get the final spectra, the simulated spectra of the conformers were averaged according to the Boltzmann distribution theory and their relative Gibbs free energy ( $\Delta G$ ). By comparing the experiment spectra with the calculated model molecules, the absolute configuration of the only chiral center was determined to be .

[1]. Sybyl Software, version X 2.0; Tripos Associates Inc.: St. Louis, MO, 2013.

[2]. Neese, F. (2012) The ORCA program system, Wiley Interdiscip. Rev.: Comput. Mol. Sci., 2, 73-78.

[3]. Stephens, P. J.; Harada, N. ECD Cotton effect approximated by the Gaussian curve and other methods. Chirality 2010, 22, 229–233.

**Table S6.** Gibbs free energies<sup>a</sup> and equilibrium populations<sup>b</sup> of low-energy conformers of 2.

| Conformers | $\Delta G$ (a.u.) | P(%) / 100 | G(a.u.)     |
|------------|-------------------|------------|-------------|
| 2-1        | 0.0               | 51.74      | -811.354315 |
| 2-2        | 0.00146           | 11.01      | -811.352854 |
| 2-3        | 0.00109           | 16.34      | -811.353227 |
| 2-4        | 0.00201           | 6.15       | -811.352304 |

|     |         |       |             |
|-----|---------|-------|-------------|
| 2-5 | 0.00118 | 14.77 | -811.353131 |
|-----|---------|-------|-------------|

<sup>a</sup>wB97M-V/def2-TZVP, in a.u.

<sup>b</sup>From  $\Delta G$  values at 298.15K.

**Table S7.** Cartesian coordinates for the low-energy reoptimized random research conformers of **2** at B3LYP-D3(BJ)/6-31G\* level of theory in methanol.

| 2-1           |               | Standard Orientation (A.U.) |           |           |           |
|---------------|---------------|-----------------------------|-----------|-----------|-----------|
| Center number | Atomic number | Atomic Type                 | X         | Y         | Z         |
| 0             | 6             | 0                           | -3.451424 | -4.28097  | -1.985013 |
| 1             | 6             | 0                           | -2.512605 | -3.343563 | 0.565469  |
| 2             | 6             | 0                           | -0.391181 | -1.287087 | 0.434259  |
| 3             | 8             | 0                           | -1.778295 | 1.008931  | -0.157312 |
| 4             | 6             | 0                           | -4.445459 | 0.538799  | -0.051916 |
| 5             | 6             | 0                           | -5.4307   | -0.072289 | -2.708532 |
| 6             | 6             | 0                           | -4.790825 | -2.727535 | -3.464158 |
| 7             | 6             | 0                           | -3.190635 | -7.016274 | -2.650718 |
| 8             | 8             | 0                           | -0.567926 | -7.673001 | -3.014321 |
| 9             | 6             | 0                           | -4.683563 | -1.753264 | 1.682842  |
| 10            | 6             | 0                           | 0.918873  | -0.986963 | 2.987479  |
| 11            | 6             | 0                           | 1.577757  | -1.72723  | -1.675801 |
| 12            | 6             | 0                           | 3.676157  | 0.271714  | -1.815274 |
| 13            | 6             | 0                           | 2.805963  | 2.922791  | -2.259316 |
| 14            | 6             | 0                           | 3.440756  | 5.003983  | -0.976811 |
| 15            | 6             | 0                           | 2.358828  | 7.535105  | -1.687191 |
| 16            | 8             | 0                           | 2.852501  | -4.062765 | -1.266044 |
| 17            | 6             | 0                           | 5.189832  | 5.077081  | 1.260169  |
| 18            | 1             | 0                           | -1.924079 | -4.922217 | 1.766336  |
| 19            | 1             | 0                           | -5.354327 | 2.247376  | 0.688951  |
| 20            | 1             | 0                           | -4.615895 | 1.297243  | -4.039541 |
| 21            | 1             | 0                           | -7.494868 | 0.183711  | -2.799735 |
| 22            | 1             | 0                           | -5.544027 | -3.421121 | -5.250875 |
| 23            | 1             | 0                           | -3.9794   | -8.164962 | -1.101839 |
| 24            | 1             | 0                           | -4.263386 | -7.426877 | -4.381303 |
| 25            | 1             | 0                           | -0.378273 | -9.475903 | -2.851873 |
| 26            | 1             | 0                           | -4.340451 | -1.220465 | 3.649045  |
| 27            | 1             | 0                           | -6.51447  | -2.703838 | 1.543967  |
| 28            | 1             | 0                           | -0.426752 | -1.050963 | 4.554122  |
| 29            | 1             | 0                           | 2.31556   | -2.491322 | 3.242799  |
| 30            | 1             | 0                           | 1.876038  | 0.843105  | 3.053061  |

|    |   |   |          |           |           |
|----|---|---|----------|-----------|-----------|
| 31 | 1 | 0 | 0.545023 | -1.746035 | -3.486043 |
| 32 | 1 | 0 | 4.842464 | 0.100006  | -0.117074 |
| 33 | 1 | 0 | 4.886107 | -0.330944 | -3.394186 |
| 34 | 1 | 0 | 1.49252  | 3.152226  | -3.830843 |
| 35 | 1 | 0 | 1.09807  | 7.39686   | -3.318331 |
| 36 | 1 | 0 | 1.282861 | 8.339492  | -0.104492 |
| 37 | 1 | 0 | 3.860301 | 8.89629   | -2.135476 |
| 38 | 1 | 0 | 1.750436 | -5.423946 | -1.817902 |
| 39 | 1 | 0 | 6.776621 | 6.364052  | 0.897684  |
| 40 | 1 | 0 | 4.200095 | 5.822019  | 2.92626   |
| 41 | 1 | 0 | 5.974377 | 3.233615  | 1.750209  |

| 2-2           |               | Standard Orientation (A.U.) |           |           |           |
|---------------|---------------|-----------------------------|-----------|-----------|-----------|
| Center number | Atomic number | Atomic Type                 | X         | Y         | Z         |
| 0             | 6             | 0                           | -2.518234 | -3.927905 | -2.07401  |
| 1             | 6             | 0                           | -2.478698 | -3.482238 | 0.757192  |
| 2             | 6             | 0                           | -0.645994 | -1.310653 | 1.544258  |
| 3             | 8             | 0                           | -2.082731 | 0.962404  | 1.035246  |
| 4             | 6             | 0                           | -4.621068 | 0.304778  | 0.295034  |
| 5             | 6             | 0                           | -4.801105 | 0.154102  | -2.592316 |
| 6             | 6             | 0                           | -3.638661 | -2.240026 | -3.582876 |
| 7             | 6             | 0                           | -1.290353 | -6.266351 | -3.077924 |
| 8             | 8             | 0                           | -2.477097 | -8.427393 | -1.924815 |
| 9             | 6             | 0                           | -5.033001 | -2.29392  | 1.469768  |
| 10            | 6             | 0                           | -0.044836 | -1.417117 | 4.368539  |
| 11            | 6             | 0                           | 1.784375  | -1.214601 | -0.064455 |
| 12            | 6             | 0                           | 3.51496   | 1.076415  | 0.392477  |
| 13            | 6             | 0                           | 2.452761  | 3.559427  | -0.488676 |
| 14            | 6             | 0                           | 2.549921  | 4.450532  | -2.850994 |
| 15            | 6             | 0                           | 1.357547  | 6.938511  | -3.528464 |
| 16            | 8             | 0                           | 3.178887  | -3.525761 | 0.24947   |
| 17            | 6             | 0                           | 3.753674  | 3.081614  | -5.029248 |
| 18            | 1             | 0                           | -2.062501 | -5.238828 | 1.759315  |
| 19            | 1             | 0                           | -5.873095 | 1.78028   | 1.033739  |
| 20            | 1             | 0                           | -3.841166 | 1.815985  | -3.389901 |
| 21            | 1             | 0                           | -6.789381 | 0.275035  | -3.195127 |
| 22            | 1             | 0                           | -3.731344 | -2.585367 | -5.611069 |
| 23            | 1             | 0                           | -1.493602 | -6.334827 | -5.147627 |
| 24            | 1             | 0                           | 0.73427   | -6.229389 | -2.604423 |

|    |   |   |           |           |           |
|----|---|---|-----------|-----------|-----------|
| 25 | 1 | 0 | -1.323588 | -9.828409 | -2.047434 |
| 26 | 1 | 0 | -5.300243 | -2.150025 | 3.514329  |
| 27 | 1 | 0 | -6.624993 | -3.32199  | 0.646455  |
| 28 | 1 | 0 | -1.765163 | -1.68498  | 5.478507  |
| 29 | 1 | 0 | 1.230932  | -2.988009 | 4.807523  |
| 30 | 1 | 0 | 0.823804  | 0.353665  | 4.98641   |
| 31 | 1 | 0 | 1.207583  | -1.184665 | -2.052917 |
| 32 | 1 | 0 | 3.996759  | 1.195281  | 2.408543  |
| 33 | 1 | 0 | 5.283096  | 0.65155   | -0.601538 |
| 34 | 1 | 0 | 1.454094  | 4.673884  | 0.919484  |
| 35 | 1 | 0 | -0.103764 | 6.684967  | -4.98106  |
| 36 | 1 | 0 | 0.485705  | 7.839858  | -1.88671  |
| 37 | 1 | 0 | 2.760476  | 8.243863  | -4.324868 |
| 38 | 1 | 0 | 4.1255    | -3.404132 | 1.801758  |
| 39 | 1 | 0 | 2.31759   | 2.59057   | -6.445708 |
| 40 | 1 | 0 | 5.132863  | 4.299314  | -5.987513 |
| 41 | 1 | 0 | 4.705179  | 1.337351  | -4.471849 |

| 2-3           |               | Standard Orientation (A.U.) |           |           |           |
|---------------|---------------|-----------------------------|-----------|-----------|-----------|
| Center number | Atomic number | Atomic Type                 | X         | Y         | Z         |
| 0             | 6             | 0                           | -2.517784 | -4.109378 | -2.057611 |
| 1             | 6             | 0                           | -2.509243 | -3.547448 | 0.75233   |
| 2             | 6             | 0                           | -0.681838 | -1.344546 | 1.46435   |
| 3             | 8             | 0                           | -2.122352 | 0.908322  | 0.868211  |
| 4             | 6             | 0                           | -4.647049 | 0.218721  | 0.120789  |
| 5             | 6             | 0                           | -4.791593 | -0.046519 | -2.761787 |
| 6             | 6             | 0                           | -3.617897 | -2.477051 | -3.645116 |
| 7             | 6             | 0                           | -1.376158 | -6.545612 | -2.940389 |
| 8             | 8             | 0                           | -2.682985 | -8.690519 | -1.899461 |
| 9             | 6             | 0                           | -5.068364 | -2.329389 | 1.398117  |
| 10            | 6             | 0                           | -0.090819 | -1.346535 | 4.291482  |
| 11            | 6             | 0                           | 1.753332  | -1.303423 | -0.14029  |
| 12            | 6             | 0                           | 3.530327  | 0.951579  | 0.315237  |
| 13            | 6             | 0                           | 2.493551  | 3.464307  | -0.505889 |
| 14            | 6             | 0                           | 2.593758  | 4.411911  | -2.845931 |
| 15            | 6             | 0                           | 1.424391  | 6.927333  | -3.457424 |
| 16            | 8             | 0                           | 3.097982  | -3.639332 | 0.182517  |
| 17            | 6             | 0                           | 3.78119   | 3.088229  | -5.060013 |
| 18            | 1             | 0                           | -2.096341 | -5.259744 | 1.832133  |

|    |   |   |           |           |           |
|----|---|---|-----------|-----------|-----------|
| 19 | 1 | 0 | -5.91071  | 1.720265  | 0.783294  |
| 20 | 1 | 0 | -3.819108 | 1.582615  | -3.609705 |
| 21 | 1 | 0 | -6.771375 | 0.05662   | -3.395734 |
| 22 | 1 | 0 | -3.672401 | -2.893047 | -5.662451 |
| 23 | 1 | 0 | -1.365006 | -6.618719 | -5.020234 |
| 24 | 1 | 0 | 0.571944  | -6.715376 | -2.264329 |
| 25 | 1 | 0 | -4.431484 | -8.534034 | -2.389857 |
| 26 | 1 | 0 | -5.349245 | -2.098321 | 3.43292   |
| 27 | 1 | 0 | -6.661049 | -3.384826 | 0.609688  |
| 28 | 1 | 0 | -1.808022 | -1.615572 | 5.406408  |
| 29 | 1 | 0 | 1.219096  | -2.872256 | 4.786222  |
| 30 | 1 | 0 | 0.738088  | 0.462091  | 4.85074   |
| 31 | 1 | 0 | 1.180182  | -1.269021 | -2.129831 |
| 32 | 1 | 0 | 4.050176  | 1.028607  | 2.324372  |
| 33 | 1 | 0 | 5.273401  | 0.5107    | -0.714633 |
| 34 | 1 | 0 | 1.507909  | 4.556196  | 0.929511  |
| 35 | 1 | 0 | -0.04389  | 6.724395  | -4.910866 |
| 36 | 1 | 0 | 0.566775  | 7.796089  | -1.790872 |
| 37 | 1 | 0 | 2.837058  | 8.238478  | -4.226484 |
| 38 | 1 | 0 | 4.050953  | -3.534539 | 1.732115  |
| 39 | 1 | 0 | 2.343806  | 2.667787  | -6.497617 |
| 40 | 1 | 0 | 5.186964  | 4.30874   | -5.975266 |
| 41 | 1 | 0 | 4.698031  | 1.310101  | -4.554352 |

| 2-4           |               | Standard Orientation (A.U.) |           |           |           |
|---------------|---------------|-----------------------------|-----------|-----------|-----------|
| Center number | Atomic number | Atomic Type                 | X         | Y         | Z         |
| 0             | 6             | 0                           | -3.377501 | -3.937529 | -1.289954 |
| 1             | 6             | 0                           | -2.221069 | -3.350178 | 1.273618  |
| 2             | 6             | 0                           | 0.120366  | -1.553566 | 1.156339  |
| 3             | 8             | 0                           | -0.985854 | 0.935526  | 0.918266  |
| 4             | 6             | 0                           | -3.692498 | 0.766984  | 1.13501   |
| 5             | 6             | 0                           | -4.886151 | 0.521646  | -1.493436 |
| 6             | 6             | 0                           | -4.612568 | -2.109955 | -2.523325 |
| 7             | 6             | 0                           | -3.200687 | -6.588438 | -2.291252 |
| 8             | 8             | 0                           | -0.722413 | -7.290973 | -3.107354 |
| 9             | 6             | 0                           | -4.109772 | -1.633193 | 2.673871  |
| 10            | 6             | 0                           | 1.648148  | -1.68008  | 3.605132  |
| 11            | 6             | 0                           | 1.816889  | -1.957978 | -1.173682 |
| 12            | 6             | 0                           | 3.697982  | 0.203817  | -1.699194 |

|    |   |   |           |           |           |
|----|---|---|-----------|-----------|-----------|
| 13 | 6 | 0 | 2.640115  | 2.18186   | -3.43286  |
| 14 | 6 | 0 | 2.128026  | 4.59972   | -2.917177 |
| 15 | 6 | 0 | 1.041145  | 6.311899  | -4.908758 |
| 16 | 8 | 0 | 3.112687  | -4.323632 | -0.721204 |
| 17 | 6 | 0 | 2.487337  | 5.831298  | -0.389174 |
| 18 | 1 | 0 | -1.767166 | -5.089935 | 2.299602  |
| 19 | 1 | 0 | -4.337385 | 2.495107  | 2.077907  |
| 20 | 1 | 0 | -3.96968  | 1.897683  | -2.752265 |
| 21 | 1 | 0 | -6.900194 | 1.040759  | -1.419084 |
| 22 | 1 | 0 | -5.499861 | -2.52566  | -4.334427 |
| 23 | 1 | 0 | -3.871154 | -7.913014 | -0.821265 |
| 24 | 1 | 0 | -4.437764 | -6.801407 | -3.937478 |
| 25 | 1 | 0 | 0.49094   | -6.682032 | -1.870196 |
| 26 | 1 | 0 | -3.598073 | -1.339066 | 4.654503  |
| 27 | 1 | 0 | -6.045278 | -2.349256 | 2.568886  |
| 28 | 1 | 0 | 3.020554  | -0.1373   | 3.674621  |
| 29 | 1 | 0 | 0.407558  | -1.476477 | 5.243115  |
| 30 | 1 | 0 | 2.663757  | -3.471874 | 3.747738  |
| 31 | 1 | 0 | 0.585036  | -2.164233 | -2.835285 |
| 32 | 1 | 0 | 4.408038  | 1.007818  | 0.064781  |
| 33 | 1 | 0 | 5.346564  | -0.65379  | -2.6365   |
| 34 | 1 | 0 | 2.233082  | 1.513097  | -5.342151 |
| 35 | 1 | 0 | 2.263553  | 7.959218  | -5.218827 |
| 36 | 1 | 0 | 0.793815  | 5.337637  | -6.714027 |
| 37 | 1 | 0 | -0.802736 | 7.052684  | -4.308245 |
| 38 | 1 | 0 | 4.195098  | -4.635014 | -2.155041 |
| 39 | 1 | 0 | 0.65656   | 6.47609   | 0.341751  |
| 40 | 1 | 0 | 3.306325  | 4.578231  | 1.026559  |
| 41 | 1 | 0 | 3.692647  | 7.51077   | -0.564108 |

| 2-5           |               | Standard Orientation (A.U.) |           |           |           |
|---------------|---------------|-----------------------------|-----------|-----------|-----------|
| Center number | Atomic number | Atomic Type                 | X         | Y         | Z         |
| 0             | 6             | 0                           | -2.282561 | -4.472228 | -1.50266  |
| 1             | 6             | 0                           | -2.083165 | -3.785    | 1.272448  |
| 2             | 6             | 0                           | -0.504111 | -1.338551 | 1.765732  |
| 3             | 8             | 0                           | -2.271744 | 0.68284   | 1.251239  |
| 4             | 6             | 0                           | -4.735545 | -0.35229  | 0.732051  |
| 5             | 6             | 0                           | -5.077463 | -0.744856 | -2.117629 |
| 6             | 6             | 0                           | -3.696549 | -3.051935 | -3.037325 |



|    |   |   |           |           |           |
|----|---|---|-----------|-----------|-----------|
| 7  | 6 | 0 | -0.909107 | -6.814369 | -2.335656 |
| 8  | 8 | 0 | -0.945045 | -7.264329 | -4.986419 |
| 9  | 6 | 0 | -4.716097 | -2.88112  | 2.113436  |
| 10 | 6 | 0 | 0.350379  | -1.182005 | 4.518289  |
| 11 | 6 | 0 | 1.741761  | -1.028524 | -0.056694 |
| 12 | 6 | 0 | 3.246587  | 1.445633  | 0.213422  |
| 13 | 6 | 0 | 1.814436  | 3.774932  | -0.550173 |
| 14 | 6 | 0 | 1.534448  | 4.643713  | -2.905846 |
| 15 | 6 | 0 | -0.014184 | 6.964048  | -3.439717 |
| 16 | 8 | 0 | 3.348676  | -3.169554 | 0.409903  |
| 17 | 6 | 0 | 2.632764  | 3.401256  | -5.211877 |
| 18 | 1 | 0 | -1.342151 | -5.368042 | 2.381121  |
| 19 | 1 | 0 | -6.125129 | 0.999165  | 1.461615  |
| 20 | 1 | 0 | -4.396117 | 0.962248  | -3.087545 |
| 21 | 1 | 0 | -7.101004 | -0.909846 | -2.575797 |
| 22 | 1 | 0 | -3.926855 | -3.595959 | -5.007336 |
| 23 | 1 | 0 | 1.036414  | -6.740067 | -1.597898 |
| 24 | 1 | 0 | -1.813112 | -8.474267 | -1.471984 |
| 25 | 1 | 0 | -0.109077 | -5.857015 | -5.787461 |
| 26 | 1 | 0 | -4.848263 | -2.606604 | 4.158246  |
| 27 | 1 | 0 | -6.216219 | -4.162392 | 1.497206  |
| 28 | 1 | 0 | -1.180975 | -1.718283 | 5.796535  |
| 29 | 1 | 0 | 1.96357   | -2.432466 | 4.844453  |
| 30 | 1 | 0 | 0.897273  | 0.756543  | 4.980644  |
| 31 | 1 | 0 | 0.977831  | -1.101957 | -1.991314 |
| 32 | 1 | 0 | 3.936213  | 1.61892   | 2.1583    |
| 33 | 1 | 0 | 4.937465  | 1.24091   | -0.977215 |
| 34 | 1 | 0 | 0.856958  | 4.783404  | 0.962876  |
| 35 | 1 | 0 | -1.584983 | 6.523506  | -4.723427 |
| 36 | 1 | 0 | -0.80257  | 7.770237  | -1.70894  |
| 37 | 1 | 0 | 1.125786  | 8.420468  | -4.380859 |
| 38 | 1 | 0 | 4.860265  | -2.963593 | -0.58446  |
| 39 | 1 | 0 | 1.113279  | 2.680723  | -6.429308 |
| 40 | 1 | 0 | 3.698592  | 4.77042   | -6.348559 |
| 41 | 1 | 0 | 3.884087  | 1.820249  | -4.768668 |

**Table S8.** Gibbs free energies<sup>a</sup> and equilibrium populations<sup>b</sup> of low-energy conformers of **2**.

| Conformers | $\Delta G(\text{a.u.})$ | P(%) / 100 | G(a.u.)     |
|------------|-------------------------|------------|-------------|
| 2-1        | 0.00158                 | 7.63       | -811.348233 |

|     |         |       |             |
|-----|---------|-------|-------------|
| 2-2 | 0.00011 | 36.29 | -811.349705 |
| 2-3 | 0.0     | 40.86 | -811.349817 |
| 2-4 | 0.00253 | 2.8   | -811.347285 |
| 2-5 | 0.00113 | 12.42 | -811.348692 |

<sup>a</sup>wB97M-V/def2-TZVP, in a.u.

<sup>b</sup>From  $\Delta G$  values at 298.15K.

**Table S9.** Cartesian coordinates for the low-energy reoptimized random research conformers of **2** at B3LYP-D3(BJ)/6-31G\* level of theory in methanol.

| 2-1           |               | Standard Orientation (A.U.) |           |           |           |
|---------------|---------------|-----------------------------|-----------|-----------|-----------|
| Center number | Atomic number | Atomic Type                 | X         | Y         | Z         |
| 0             | 6             | 0                           | 5.065989  | -4.105995 | -0.440487 |
| 1             | 6             | 0                           | 6.643684  | -2.476978 | 1.325827  |
| 2             | 6             | 0                           | 7.784537  | -0.04562  | 0.108788  |
| 3             | 8             | 0                           | 5.558636  | 1.534427  | -0.223694 |
| 4             | 6             | 0                           | 3.508504  | 0.586924  | 1.332182  |
| 5             | 6             | 0                           | 1.640961  | -0.858679 | -0.32947  |
| 6             | 6             | 0                           | 2.755854  | -3.345931 | -1.140468 |
| 7             | 6             | 0                           | 6.141349  | -6.599001 | -1.268143 |
| 8             | 8             | 0                           | 8.500121  | -6.331596 | -2.540964 |
| 9             | 6             | 0                           | 4.762827  | -1.246181 | 3.175857  |
| 10            | 6             | 0                           | 9.660317  | 1.210746  | 1.922552  |
| 11            | 6             | 0                           | 9.07209   | -0.303325 | -2.497578 |
| 12            | 6             | 0                           | 10.093256 | 2.225926  | -3.556925 |
| 13            | 6             | 0                           | 12.758865 | 2.841132  | -2.820087 |
| 14            | 6             | 0                           | 13.685071 | 5.021921  | -1.940757 |
| 15            | 6             | 0                           | 16.455848 | 5.311139  | -1.376717 |
| 16            | 8             | 0                           | 7.44361   | -1.418635 | -4.34966  |
| 17            | 6             | 0                           | 12.13607  | 7.341518  | -1.408825 |
| 18            | 1             | 0                           | 8.120278  | -3.606358 | 2.235013  |
| 19            | 1             | 0                           | 2.609463  | 2.215857  | 2.24167   |
| 20            | 1             | 0                           | 1.153695  | 0.30786   | -1.979077 |
| 21            | 1             | 0                           | -0.141617 | -1.164699 | 0.700691  |
| 22            | 1             | 0                           | 1.621428  | -4.552816 | -2.363976 |
| 23            | 1             | 0                           | 6.522979  | -7.78394  | 0.394926  |
| 24            | 1             | 0                           | 4.747691  | -7.603316 | -2.44687  |
| 25            | 1             | 0                           | 8.243656  | -4.978641 | -3.757753 |
| 26            | 1             | 0                           | 5.679434  | -0.258388 | 4.737646  |
| 27            | 1             | 0                           | 3.425701  | -2.61746  | 3.951947  |
| 28            | 1             | 0                           | 8.991897  | 1.171965  | 3.872527  |

|    |   |   |           |           |           |
|----|---|---|-----------|-----------|-----------|
| 29 | 1 | 0 | 11.493146 | 0.252256  | 1.847796  |
| 30 | 1 | 0 | 9.956547  | 3.179014  | 1.385828  |
| 31 | 1 | 0 | 10.652062 | -1.631686 | -2.264936 |
| 32 | 1 | 0 | 10.040403 | 1.985135  | -5.617864 |
| 33 | 1 | 0 | 8.765884  | 3.747735  | -3.111342 |
| 34 | 1 | 0 | 14.100027 | 1.299682  | -3.116411 |
| 35 | 1 | 0 | 17.278467 | 6.863148  | -2.481046 |
| 36 | 1 | 0 | 16.754157 | 5.78648   | 0.621521  |
| 37 | 1 | 0 | 17.511272 | 3.58601   | -1.798961 |
| 38 | 1 | 0 | 5.744863  | -0.857196 | -3.970065 |
| 39 | 1 | 0 | 12.415082 | 7.957958  | 0.5532    |
| 40 | 1 | 0 | 12.756316 | 8.915458  | -2.609772 |
| 41 | 1 | 0 | 10.114928 | 7.068988  | -1.717157 |

| 2-2           |               | Standard Orientation (A.U.) |           |           |           |
|---------------|---------------|-----------------------------|-----------|-----------|-----------|
| Center number | Atomic number | Atomic Type                 | X         | Y         | Z         |
| 0             | 6             | 0                           | 7.055117  | -3.990425 | 1.068385  |
| 1             | 6             | 0                           | 7.593779  | -1.472262 | 2.340946  |
| 2             | 6             | 0                           | 7.384144  | 0.825859  | 0.516944  |
| 3             | 8             | 0                           | 4.652166  | 1.154338  | 0.265792  |
| 4             | 6             | 0                           | 3.359838  | -0.377551 | 2.116584  |
| 5             | 6             | 0                           | 2.492512  | -2.850623 | 0.897702  |
| 6             | 6             | 0                           | 4.68523   | -4.598375 | 0.442598  |
| 7             | 6             | 0                           | 9.263684  | -5.731919 | 0.642468  |
| 8             | 8             | 0                           | 8.616306  | -8.200618 | -0.18     |
| 9             | 6             | 0                           | 5.364153  | -0.916047 | 4.121728  |
| 10            | 6             | 0                           | 8.489751  | 3.235945  | 1.656176  |
| 11            | 6             | 0                           | 8.352848  | 0.340607  | -2.186887 |
| 12            | 6             | 0                           | 11.25178  | 0.212659  | -2.482426 |
| 13            | 6             | 0                           | 12.660338 | 2.682183  | -2.556448 |
| 14            | 6             | 0                           | 13.098735 | 4.099271  | -4.602416 |
| 15            | 6             | 0                           | 14.560006 | 6.528354  | -4.403607 |
| 16            | 8             | 0                           | 7.432204  | 2.238647  | -3.85888  |
| 17            | 6             | 0                           | 12.187272 | 3.483666  | -7.215823 |
| 18            | 1             | 0                           | 9.426242  | -1.498085 | 3.3048    |
| 19            | 1             | 0                           | 1.745681  | 0.71743   | 2.814932  |
| 20            | 1             | 0                           | 1.534758  | -2.410756 | -0.891375 |
| 21            | 1             | 0                           | 1.07228   | -3.780419 | 2.102803  |
| 22            | 1             | 0                           | 4.305878  | -6.399231 | -0.474594 |

|    |   |   |           |           |           |
|----|---|---|-----------|-----------|-----------|
| 23 | 1 | 0 | 10.502754 | -4.960521 | -0.834074 |
| 24 | 1 | 0 | 10.409952 | -5.798566 | 2.388407  |
| 25 | 1 | 0 | 7.535771  | -8.935777 | 1.090923  |
| 26 | 1 | 0 | 5.710213  | 0.732986  | 5.315578  |
| 27 | 1 | 0 | 4.884724  | -2.532982 | 5.316839  |
| 28 | 1 | 0 | 8.439375  | 4.750781  | 0.252392  |
| 29 | 1 | 0 | 7.397635  | 3.834596  | 3.302426  |
| 30 | 1 | 0 | 10.452481 | 2.950744  | 2.239057  |
| 31 | 1 | 0 | 7.5825    | -1.508734 | -2.753771 |
| 32 | 1 | 0 | 12.001528 | -0.944419 | -0.93262  |
| 33 | 1 | 0 | 11.623128 | -0.848143 | -4.221852 |
| 34 | 1 | 0 | 13.415593 | 3.364405  | -0.768809 |
| 35 | 1 | 0 | 13.409159 | 8.127923  | -5.053515 |
| 36 | 1 | 0 | 15.164682 | 6.909618  | -2.464677 |
| 37 | 1 | 0 | 16.243374 | 6.480753  | -5.615668 |
| 38 | 1 | 0 | 5.626262  | 2.300488  | -3.593131 |
| 39 | 1 | 0 | 11.263369 | 1.646536  | -7.34105  |
| 40 | 1 | 0 | 10.802357 | 4.900591  | -7.826247 |
| 41 | 1 | 0 | 13.760409 | 3.549807  | -8.566785 |

| 2-3           |               | Standard Orientation (A.U.) |           |           |           |
|---------------|---------------|-----------------------------|-----------|-----------|-----------|
| Center number | Atomic number | Atomic Type                 | X         | Y         | Z         |
| 0             | 6             | 0                           | 6.632905  | -4.192691 | -0.041029 |
| 1             | 6             | 0                           | 7.543192  | -2.127427 | 1.734342  |
| 2             | 6             | 0                           | 7.430771  | 0.553801  | 0.535779  |
| 3             | 8             | 0                           | 4.727096  | 1.13758   | 0.617678  |
| 4             | 6             | 0                           | 3.438527  | -0.663789 | 2.209388  |
| 5             | 6             | 0                           | 2.206488  | -2.695953 | 0.56138   |
| 6             | 6             | 0                           | 4.160841  | -4.453817 | -0.507809 |
| 7             | 6             | 0                           | 8.542508  | -5.976098 | -1.14079  |
| 8             | 8             | 0                           | 9.984167  | -7.239742 | 0.777634  |
| 9             | 6             | 0                           | 5.533218  | -1.83489  | 3.8137    |
| 10            | 6             | 0                           | 8.838072  | 2.521783  | 2.108843  |
| 11            | 6             | 0                           | 8.152823  | 0.675422  | -2.283986 |
| 12            | 6             | 0                           | 10.994766 | 0.416338  | -2.879751 |
| 13            | 6             | 0                           | 12.636867 | 2.691533  | -2.419591 |
| 14            | 6             | 0                           | 13.056442 | 4.595666  | -4.02722  |
| 15            | 6             | 0                           | 14.769737 | 6.74805   | -3.314219 |
| 16            | 8             | 0                           | 7.286877  | 2.983669  | -3.365411 |

|    |   |   |           |           |           |
|----|---|---|-----------|-----------|-----------|
| 17 | 6 | 0 | 11.887545 | 4.824927  | -6.600369 |
| 18 | 1 | 0 | 9.426014  | -2.575847 | 2.460086  |
| 19 | 1 | 0 | 2.016202  | 0.3699    | 3.30523   |
| 20 | 1 | 0 | 1.152599  | -1.767819 | -0.968479 |
| 21 | 1 | 0 | 0.805496  | -3.769204 | 1.665255  |
| 22 | 1 | 0 | 3.512856  | -5.980906 | -1.729243 |
| 23 | 1 | 0 | 7.594558  | -7.342305 | -2.391698 |
| 24 | 1 | 0 | 9.947014  | -4.960237 | -2.276879 |
| 25 | 1 | 0 | 8.795769  | -8.108154 | 1.85299   |
| 26 | 1 | 0 | 6.143747  | -0.563518 | 5.321584  |
| 27 | 1 | 0 | 4.981413  | -3.647987 | 4.639503  |
| 28 | 1 | 0 | 10.789634 | 1.935258  | 2.453495  |
| 29 | 1 | 0 | 8.867277  | 4.325124  | 1.101212  |
| 30 | 1 | 0 | 7.910337  | 2.809679  | 3.930208  |
| 31 | 1 | 0 | 7.178712  | -0.921536 | -3.200383 |
| 32 | 1 | 0 | 11.733459 | -1.180868 | -1.783073 |
| 33 | 1 | 0 | 11.127171 | -0.139273 | -4.871246 |
| 34 | 1 | 0 | 13.600942 | 2.771826  | -0.604185 |
| 35 | 1 | 0 | 13.744897 | 8.551064  | -3.384831 |
| 36 | 1 | 0 | 15.54856  | 6.518061  | -1.413967 |
| 37 | 1 | 0 | 16.347436 | 6.913872  | -4.651615 |
| 38 | 1 | 0 | 5.528052  | 3.124114  | -2.892715 |
| 39 | 1 | 0 | 10.809194 | 3.158862  | -7.154246 |
| 40 | 1 | 0 | 10.576503 | 6.430781  | -6.635062 |
| 41 | 1 | 0 | 13.347065 | 5.199852  | -8.026296 |

| 2-4           |               | Standard Orientation (A.U.) |           |           |           |
|---------------|---------------|-----------------------------|-----------|-----------|-----------|
| Center number | Atomic number | Atomic Type                 | X         | Y         | Z         |
| 0             | 6             | 0                           | 5.679124  | -4.080508 | -1.317633 |
| 1             | 6             | 0                           | 7.253921  | -2.830523 | 0.730437  |
| 2             | 6             | 0                           | 8.115862  | -0.097506 | 0.063246  |
| 3             | 8             | 0                           | 5.769377  | 1.322814  | 0.299497  |
| 4             | 6             | 0                           | 3.926846  | -0.156574 | 1.694304  |
| 5             | 6             | 0                           | 2.031801  | -1.340527 | -0.138461 |
| 6             | 6             | 0                           | 3.249333  | -3.445673 | -1.614441 |
| 7             | 6             | 0                           | 6.930757  | -6.044936 | -2.921219 |
| 8             | 8             | 0                           | 7.86664   | -8.128021 | -1.449645 |
| 9             | 6             | 0                           | 5.459456  | -2.256089 | 2.943375  |
| 10            | 6             | 0                           | 10.072294 | 0.845112  | 1.973507  |

|    |   |   |           |           |           |
|----|---|---|-----------|-----------|-----------|
| 11 | 6 | 0 | 9.131921  | 0.34074   | -2.644506 |
| 12 | 6 | 0 | 10.08127  | 3.072175  | -3.11827  |
| 13 | 6 | 0 | 12.806092 | 3.52516   | -2.491261 |
| 14 | 6 | 0 | 13.833503 | 5.425649  | -1.179947 |
| 15 | 6 | 0 | 16.646444 | 5.588889  | -0.805209 |
| 16 | 8 | 0 | 7.31288   | -0.29327  | -4.516441 |
| 17 | 6 | 0 | 12.368258 | 7.523194  | 0.05121   |
| 18 | 1 | 0 | 8.859313  | -4.03011  | 1.24462   |
| 19 | 1 | 0 | 2.987521  | 1.119244  | 3.028061  |
| 20 | 1 | 0 | 1.31986   | 0.130269  | -1.423839 |
| 21 | 1 | 0 | 0.371845  | -2.033843 | 0.908523  |
| 22 | 1 | 0 | 2.121378  | -4.383633 | -3.059699 |
| 23 | 1 | 0 | 5.630091  | -6.69857  | -4.406541 |
| 24 | 1 | 0 | 8.594334  | -5.238681 | -3.855426 |
| 25 | 1 | 0 | 6.440845  | -8.83063  | -0.558282 |
| 26 | 1 | 0 | 6.437627  | -1.596312 | 4.635575  |
| 27 | 1 | 0 | 4.293119  | -3.887466 | 3.443199  |
| 28 | 1 | 0 | 10.194796 | 2.902419  | 1.913283  |
| 29 | 1 | 0 | 9.59605   | 0.288195  | 3.901273  |
| 30 | 1 | 0 | 11.944659 | 0.087718  | 1.52332   |
| 31 | 1 | 0 | 10.722987 | -0.971069 | -2.921145 |
| 32 | 1 | 0 | 9.839666  | 3.351783  | -5.160723 |
| 33 | 1 | 0 | 8.808665  | 4.412298  | -2.188631 |
| 34 | 1 | 0 | 14.100038 | 2.124558  | -3.283928 |
| 35 | 1 | 0 | 17.124461 | 5.540942  | 1.214244  |
| 36 | 1 | 0 | 17.638607 | 4.038424  | -1.743356 |
| 37 | 1 | 0 | 17.391075 | 7.37874   | -1.544459 |
| 38 | 1 | 0 | 5.705723  | 0.299348  | -3.877427 |
| 39 | 1 | 0 | 12.947033 | 9.358791  | -0.722913 |
| 40 | 1 | 0 | 10.326853 | 7.352095  | -0.188912 |
| 41 | 1 | 0 | 12.77895  | 7.591025  | 2.084787  |

| 2-5           |               | Standard Orientation (A.U.) |          |           |           |
|---------------|---------------|-----------------------------|----------|-----------|-----------|
| Center number | Atomic number | Atomic Type                 | X        | Y         | Z         |
| 0             | 6             | 0                           | 6.659035 | -4.251171 | -1.138329 |
| 1             | 6             | 0                           | 7.671242 | -2.528249 | 0.930366  |
| 2             | 6             | 0                           | 7.135504 | 0.346003  | 0.558431  |
| 3             | 8             | 0                           | 4.477153 | 0.585026  | 1.293497  |
| 4             | 6             | 0                           | 3.604443 | -1.750005 | 2.380413  |

|    |   |   |           |           |           |
|----|---|---|-----------|-----------|-----------|
| 5  | 6 | 0 | 2.283495  | -3.339358 | 0.351919  |
| 6  | 6 | 0 | 4.162992  | -4.593415 | -1.363089 |
| 7  | 6 | 0 | 8.483892  | -5.794476 | -2.668211 |
| 8  | 8 | 0 | 10.243341 | -4.334084 | -4.116624 |
| 9  | 6 | 0 | 6.020631  | -3.04839  | 3.276978  |
| 10 | 6 | 0 | 8.714325  | 1.966004  | 2.344598  |
| 11 | 6 | 0 | 7.242108  | 1.321857  | -2.189208 |
| 12 | 6 | 0 | 9.898498  | 1.668074  | -3.305618 |
| 13 | 6 | 0 | 11.290545 | 4.006437  | -2.514199 |
| 14 | 6 | 0 | 13.685565 | 4.162679  | -1.721276 |
| 15 | 6 | 0 | 14.840787 | 6.678501  | -1.072294 |
| 16 | 8 | 0 | 5.959922  | 3.685145  | -2.38539  |
| 17 | 6 | 0 | 15.433256 | 1.952453  | -1.355007 |
| 18 | 1 | 0 | 9.689606  | -2.862218 | 1.236626  |
| 19 | 1 | 0 | 2.292732  | -1.271997 | 3.911084  |
| 20 | 1 | 0 | 0.994376  | -2.111942 | -0.717707 |
| 21 | 1 | 0 | 1.091209  | -4.793632 | 1.244211  |
| 22 | 1 | 0 | 3.439022  | -5.907171 | -2.774498 |
| 23 | 1 | 0 | 9.668225  | -6.923767 | -1.39171  |
| 24 | 1 | 0 | 7.434558  | -7.116821 | -3.8848   |
| 25 | 1 | 0 | 9.277201  | -3.309838 | -5.275056 |
| 26 | 1 | 0 | 6.761235  | -2.150616 | 4.982977  |
| 27 | 1 | 0 | 5.769423  | -5.069794 | 3.628919  |
| 28 | 1 | 0 | 10.731971 | 1.725259  | 1.970939  |
| 29 | 1 | 0 | 8.251467  | 3.959384  | 2.061248  |
| 30 | 1 | 0 | 8.32727   | 1.482609  | 4.314388  |
| 31 | 1 | 0 | 6.240756  | -0.097324 | -3.343129 |
| 32 | 1 | 0 | 10.988534 | -0.045212 | -2.93489  |
| 33 | 1 | 0 | 9.639761  | 1.764823  | -5.369435 |
| 34 | 1 | 0 | 10.21458  | 5.751492  | -2.683092 |
| 35 | 1 | 0 | 16.533125 | 7.037412  | -2.218366 |
| 36 | 1 | 0 | 13.51199  | 8.231516  | -1.37235  |
| 37 | 1 | 0 | 15.453017 | 6.718281  | 0.911009  |
| 38 | 1 | 0 | 4.349366  | 3.451523  | -1.556143 |
| 39 | 1 | 0 | 14.563335 | 0.128272  | -1.771353 |
| 40 | 1 | 0 | 17.107329 | 2.145353  | -2.565416 |
| 41 | 1 | 0 | 16.132114 | 1.905185  | 0.59945   |

**Table S10.** IC<sub>50</sub> (48h,  $\mu$ M) of compounds **1–8** against human tumor cell lines.

| Compounds    | 1    | 2   | 3   | 4   | 5   | 6   | 7   | 8   |
|--------------|------|-----|-----|-----|-----|-----|-----|-----|
| <b>A549</b>  | 14.6 | >40 | >40 | >40 | >40 | >40 | >40 | >40 |
| <b>HL60</b>  | >40  | >40 | >40 | >40 | >40 | >40 | >40 | >40 |
| <b>HepG2</b> | >40  | >40 | >40 | >40 | >40 | >40 | >40 | >40 |
| <b>MCF7</b>  | >40  | >40 | >40 | >40 | >40 | >40 | >40 | >40 |

**Table S11.** Immunosuppressive effects of compounds **1–8** on murine lymphocyte proliferation induced by ConA (5  $\mu$ g/mL) or LPS (10  $\mu$ g/mL).

| Compounds            | IC <sub>50</sub> ( $\mu$ M) |         |
|----------------------|-----------------------------|---------|
|                      | T cells                     | B cells |
| <b>1</b>             | >40                         | >40     |
| <b>2</b>             | >40                         | >40     |
| <b>3</b>             | >40                         | >40     |
| <b>4</b>             | >40                         | >40     |
| <b>5</b>             | >40                         | >40     |
| <b>6</b>             | >40                         | >40     |
| <b>7</b>             | >40                         | >40     |
| <b>8</b>             | >40                         | 16.6    |
| <b>Cyclosporin A</b> | 0.04                        |         |
